# Supplementary material
Source: PubMed Central journal article supplement (PMC5612505)
Supplement: NIHMS906761-supplement-Supporting_tables_and_figures.pdf [file NIHMS906761-supplement-Supporting_tables_and_figures.pdf]

# Supporting Information

## Absolute binding free energies between T4 lysozyme and 141 small molecules: calculations based on multiple rigid receptor structures

Bing Xie, Trung Hai Nguyen, and David D. L. Minh\*

*Department of Chemistry, Illinois Institute of Technology, Chicago, IL 60616, USA*

E-mail: [dminh@iit.edu](mailto:dminh@iit.edu)

---

\*To whom correspondence should be addressed

Table S1: Names and SMILES strings<sup>1</sup> of all 141 small molecules

| 70 active compounds        | SMILES                                  |
|----------------------------|-----------------------------------------|
| 1-methylpyrrole            | <chem>CN1C=CC=C1</chem>                 |
| iodobenzene                | <chem>Ic1ccccc1</chem>                  |
| p-methylphenyl azide       | <chem>CC1=CC=C(C=C1)N=[N+]=[N-]</chem>  |
| phenyl azide               | <chem>[N-]=[N+]=NC1=CC=CC=C1</chem>     |
| allyl ethyl sulfoxide      | <chem>CCS(=O)(=O)CC=C</chem>            |
| fluorobenzene              | <chem>Fc1ccccc1</chem>                  |
| ethylbenzene               | <chem>CCc1ccccc1</chem>                 |
| bromoethane                | <chem>CCBr</chem>                       |
| benzyl mercaptan           | <chem>SCc1ccccc1</chem>                 |
| 2-phenylpropanol           | <chem>CC(CO)C1=CC=CC=C1</chem>          |
| anisole                    | <chem>COc1ccccc1</chem>                 |
| iodoethane                 | <chem>CCI</chem>                        |
| diisopropyl disulfide      | <chem>CC(C)SSC(C)C</chem>               |
| diethyl disulfide          | <chem>CCSSCC</chem>                     |
| cyclohexene                | <chem>C1CCC=CC1</chem>                  |
| 4-(methylthio)nitrobenzene | <chem>1=CC=C(C=C1)[N+](=O)[O-]</chem>   |
| 2,6-difluorobenzyl bromide | <chem>C1=CC(=C(C(=C1)F)CBr)F</chem>     |
| thiophenol                 | <chem>Sc1ccccc1</chem>                  |
| $\beta$ -chlorophenetole   | <chem>C1=CC=C(C=C1)OCCCl</chem>         |
| cis-3-hexenyl formate      | <chem>CC/C=C\CCOC=O</chem>              |
| 6-methyl-1,5-heptadiene    | <chem>CC(=CCCC=C)C</chem>               |
| 2-ethoxyphenol             | <chem>CCOC1=CC=CC=C1O</chem>            |
| 3-methyl benzyl azide      | <chem>CC1=CC(=CC=C1)CN=[N+]=[N-]</chem> |
| n-methylaniline            | <chem>CNC1=CC=CC=C1</chem>              |
| 1,2-benzenedithiol         | <chem>C1=CC=C(C(=C1)S)S</chem>          |
| 1,2-dichlorobenzene        | <chem>C1=CC=C(C(=C1)Cl)Cl</chem>        |
| 2-(methylthio)-thiophene   | <chem>CSc1cccs1</chem>                  |
| thiophene-2-thiol          | <chem>Sc1cccs1</chem>                   |
| 2-(thienylthio)-acetone    | <chem>CC(=O)CSc1cccs1</chem>            |
| methyl ethyl cyclopentene  | <chem>CCC1=C(C)CCC1</chem>              |
| allyl ethyl sulfide        | <chem>CCSCC=C</chem>                    |
| allyl sulfide              | <chem>C=CCSCC=C</chem>                  |
| allyl n-propylether        | <chem>CCCOCC=C</chem>                   |
| 3-phenyl-1-propanethiol    | <chem>SCCCc1ccccc1</chem>               |
| 3-iodotoluene              | <chem>Cc1cccc(c1)I</chem>               |
| 3-ethyltoluene             | <chem>CCc1cccc(C)c1</chem>              |
| 2-methylbenzofuran         | <chem>Cc1cc2ccccc2o1</chem>             |
| 4-iodotoluene              | <chem>Cc1ccc(cc1)I</chem>               |
| 4-ethyltoluene             | <chem>CCc1ccc(C)cc1</chem>              |
| 3-phenyl-1-propanol        | <chem>OCCc1ccccc1</chem>                |
| benzofuran                 | <chem>c2cc1ccccc1o2</chem>              |
| amylbenzene                | <chem>CCCCC1ccccc1</chem>               |
| 1-phenyl-1-propyne         | <chem>CC#Cc1ccccc1</chem>               |
| 1,2-benzisoxazole          | <chem>c1noc2ccccc12</chem>              |
| 2-iodotoluene              | <chem>Cc1ccccc1I</chem>                 |
| 2-iodopropane              | <chem>CC(C)I</chem>                     |

|                          |                                               |
|--------------------------|-----------------------------------------------|
| 2-ethyltoluene           | <chem>CCc1ccccc1C</chem>                      |
| 2-ethylfuran             | <chem>CCc1ccco1</chem>                        |
| benzene                  | <chem>c1ccccc1</chem>                         |
| indene                   | <chem>C1C=Cc2ccccc21</chem>                   |
| indole                   | <chem>c2cc1ccccc1[nH]2</chem>                 |
| hexafluorobenzene        | <chem>Fc1c(c(c(c1F)F)F)F)F</chem>             |
| methylcyclohexane        | <chem>CC1CCCCC1</chem>                        |
| m-xylene                 | <chem>Cc1ccc(cc1)C</chem>                     |
| isobutylbenzene          | <chem>CC(C)Cc1ccccc1</chem>                   |
| n-hexylbenzene           | <chem>CCCCCCc1ccccc1</chem>                   |
| nitrobenzene             | <chem>[O]N(=O)c1ccccc1</chem>                 |
| naphthalene              | <chem>c2ccc1ccccc1c2</chem>                   |
| n-butylbenzene           | <chem>CCCCc1ccccc1</chem>                     |
| phenylacetylene          | <chem>C#Cc1ccccc1</chem>                      |
| dipropyl disulfide       | <chem>CCCSSCCC</chem>                         |
| n-propylbenzene          | <chem>CCCc1ccccc1</chem>                      |
| o-xylene                 | <chem>Cc1ccccc1C</chem>                       |
| styrene                  | <chem>C=Cc1ccccc1</chem>                      |
| thianaphthene            | <chem>c2cc1ccccc1s2</chem>                    |
| sec-butyl-benzene        | <chem>CCC(C)c1ccccc1</chem>                   |
| thioanisole              | <chem>CSc1ccccc1</chem>                       |
| toluene                  | <chem>Cc1ccccc1</chem>                        |
| p-xylene                 | <chem>Cc1ccc(cc1)C</chem>                     |
| iodopentafluorobenzene   | <chem>C1(=C(C(=C(C(=C1F)F)I)F)F)F</chem>      |
| 71 inactive compounds    | SMILES                                        |
| 2-iodoethanol            | <chem>OCCI</chem>                             |
| 2-bromoethanol           | <chem>OCCBr</chem>                            |
| benzyl-alcohol           | <chem>OCc1ccccc1</chem>                       |
| 3-chlorophenol           | <chem>Oc1cccc(Cl)c1</chem>                    |
| azulene                  | <chem>c1cc2cccccc2c1</chem>                   |
| ethanol                  | <chem>CCO</chem>                              |
| methanol                 | <chem>CO</chem>                               |
| dimethyl-sulfoxide       | <chem>CS(=O)C</chem>                          |
| mesitylene               | <chem>Cc1cc(C)cc(C)c1</chem>                  |
| 2,5-dimethylfuran        | <chem>Cc1ccc(C)o1</chem>                      |
| p-cresol                 | <chem>Cc1ccc(O)cc1</chem>                     |
| chloroform               | <chem>ClC(Cl)Cl</chem>                        |
| pentafluorophenyl-azide  | <chem>Fc1c(F)c(F)c(N=[N+]=[N-])c(F)c1F</chem> |
| 6,7-ifluorobenzotriazole | <chem>Fc1ccc2nn[nH]c2c1F</chem>               |
| pentafluoroaniline       | <chem>Nc1c(F)c(F)c(F)c(F)c1F</chem>           |
| 1,4-diiodobenzene        | <chem>Ic1ccc(I)cc1</chem>                     |
| 1,2-diiodobenzene        | <chem>Ic1ccccc1I</chem>                       |
| trans-cinnamaldehyde     | <chem>O=CC=Cc1ccccc1</chem>                   |
| cyclohexane              | <chem>C1CCCCC1</chem>                         |
| tert-butylbenzene        | <chem>CC(C)(C)c1ccccc1</chem>                 |
| isobutane                | <chem>CC(C)C</chem>                           |
| (-)-camphene             | <chem>CC1(C)C2CCC(C2)C1=C</chem>              |
| DL-camphor               | <chem>CC1(C)C2CCC1(C)C(=O)C2</chem>           |

|                                      |                               |
|--------------------------------------|-------------------------------|
| 1-octanol                            | CCCCCCCCO                     |
| 1-heptanol                           | CCCCCCCCO                     |
| N-heptylbenzene                      | CCCCCCCCc1ccccc1              |
| dibutyl-disulfide                    | CCCCSSCCCC                    |
| 1-propanol                           | CCCO                          |
| 1,1-diethylurea                      | CCN(CC)C(=O)N                 |
| benzaldehyde                         | O=Cc1ccccc1                   |
| 2,6-difluorophenyl azide             | FC1=CC=CC(F)=C1N=[N+]=[N-]    |
| benzoic-acid                         | OC(=O)c1ccccc1                |
| n,n'-dimethylaniline                 | CN(C)C1=CC=CC=C1              |
| benzaldehyde-oxime                   | ON=Cc1ccccc1                  |
| quinoline                            | c1ccc2ncccc2c1                |
| furan                                | c1ccoc1                       |
| pyridine                             | c1ccncc1                      |
| 2,1-benzisoxazole                    | c1onc2ccccc12                 |
| 2,5-diaminophenol                    | c1(c(N)ccc(c1)N)O             |
| 2-methylbenzyl alcohol               | c1(CO)c(C)cccc1               |
| 4-hydrazinothieno[2,3-D]pyrimidine   | c12c(ncnc1scc2)NN             |
| 1,6-naphthyridine                    | c12cnccc1nccc2                |
| 8-aminoquinoline                     | c12cccc(N)c1nccc2             |
| 1,2,4-triazolo[1,5-A]pyrimidine      | c12ncnn2cccn1                 |
| 3-methoxymethylindole                | c12c(COC)c[nH]c2cccc1         |
| 1-methylnaphthalene                  | c12cccc(C)c1cccc2             |
| 2-amino-4-hydroxypteridine           | c12c([nH]c(N)nc1nccn2)=O      |
| acenaphthylene                       | c12c3cccc1cccc2C=C3           |
| 2-(methylsulfanyl)-4-quinazolinamine | c12nc(SC)nc(c2cccc1)N         |
| aniline                              | Nc1ccccc1                     |
| D-camphor                            | O=C1CC2CCC1(C)C2(C)C          |
| 3,5-dichloroanisole                  | COc1cc(Cl)cc(Cl)c1            |
| (+)-camphene                         | CC1([C@@H]2CC[C@@H](C2)C1=C)C |
| 3,5-difluoro-aniline                 | Nc1cc(F)cc(F)c1               |
| 3-methylrrole                        | Cc1cc[nH]c1                   |
| 2-fluoro-aniline                     | Nc1ccccc1F                    |
| 2,4-difluoro-aniline                 | Nc1ccc(F)cc1F                 |
| 2-fluorobenzaldehyde                 | O=Cc1c(cccc1)F                |
| 2,4-difluoro-phenol                  | Oc1ccc(F)cc1F                 |
| 1-vinylimidazole                     | C(=C)N1ccnc1                  |
| 3-fluorobenzonitrile                 | c1(ccc(cc1)C#N)               |
| 5-bromopyrimidine                    | c1ncccc1Br                    |
| 4-vinylpyridine                      | c1(ccncc1)C=C                 |
| methyl chlorodifluoroacetate         | C(C(OC)=O)(F)(F)Cl            |
| nitrosobenzene                       | C1=CC=C(C=C1)N=O              |
| 2-benzylpyridine                     | c1(ccccc1)Cc2cccn2            |
| 1-naphthalenemethanol                | c12c(cccc1cccc2)CO            |
| 2-fluoroaniline                      | C1=CC=C(C(=C1)N)F             |
| 2-phenoxyethanol                     | C1=CC=C(C=C1)OCCO             |
| 1-phenyl-semicarbazide               | NC(=O)NNc1ccccc1              |
| phenol                               | Oc1ccccc1c1                   |

Table S2: **YANK binding free energy estimates** between T4 lysozyme and 24 ligands. The mean value and standard deviation (in parentheses) of three independent simulations are reported.

| Ligand names      | Ligand structures | $\Delta G^\circ$ (kcal/mol) | Ligand names        | Ligand structures | $\Delta G^\circ$ (kcal/mol) |
|-------------------|-------------------|-----------------------------|---------------------|-------------------|-----------------------------|
| 1-methylpyrrole   |                   | -3.65 (0.39)                | benzofuran          |                   | -5.31 (0.42)                |
| 4-ethyltoluene    |                   | -6.52 (0.14)                | allyl ethyl sulfide |                   | -4.23 (0.34)                |
| benzene           |                   | -4.45 (0.25)                | hexafluorobenzene   |                   | -2.42 (0.27)                |
| indole            |                   | -4.48 (0.12)                | m-xylene            |                   | -5.05 (0.21)                |
| N-hexylbenzene    |                   | -7.90 (0.02)                | nitrobenzene        |                   | -8.58 (0.19)                |
| p-xylene          |                   | -5.84 (0.09)                | DL-camphor          |                   | -7.45 (0.35)                |
| 1-propanol        |                   | -1.84 (0.19)                | 1,1-diethylurea     |                   | -4.98 (0.33)                |
| 1,4-diiodobenzene |                   | -9.70 (0.13)                | 1,2-diiodobenzene   |                   | -11.48 (0.13)               |
| 2-bromoethanol    |                   | -2.16 (0.28)                | 2-iodoethanol       |                   | -2.28 (0.32)                |
| benzyl alcohol    |                   | -3.75 (0.15)                | benzaldehyde oxime  |                   | -5.53 (0.55)                |
| phenol            |                   | -2.88 (0.39)                | ethanol             |                   | -0.88 (0.14)                |
| methanol          |                   | 0.38 (0.27)                 | dimethyl-sulfoxide  |                   | -0.82 (0.98)                |

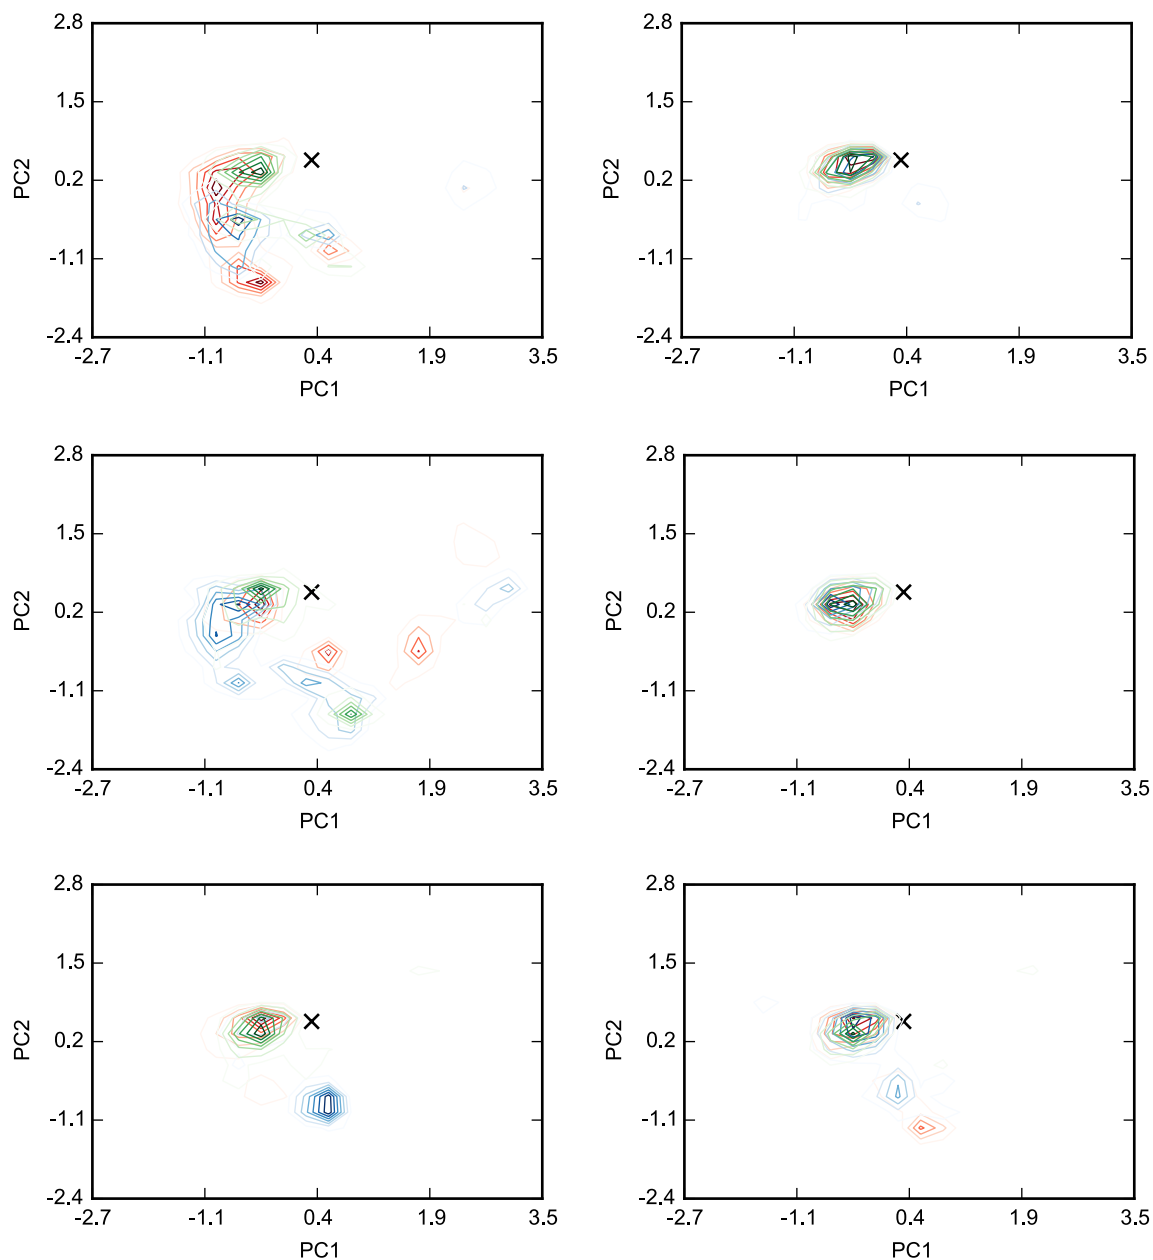

Figure S1: **2D histograms of the first and second principal components** of the unbound (left column) and bound (right column) receptor conformations sampled by YANK for complexes between T4-lysozyme and 24 ligands. Principal components analysis was performed on snapshots from all YANK simulations for heavy atoms within 5 Å of Val 111 in PDB ID 3DMZ. Ligands on this page, from top to bottom, are 1-methylpyrrole, benzene, benzofuran.

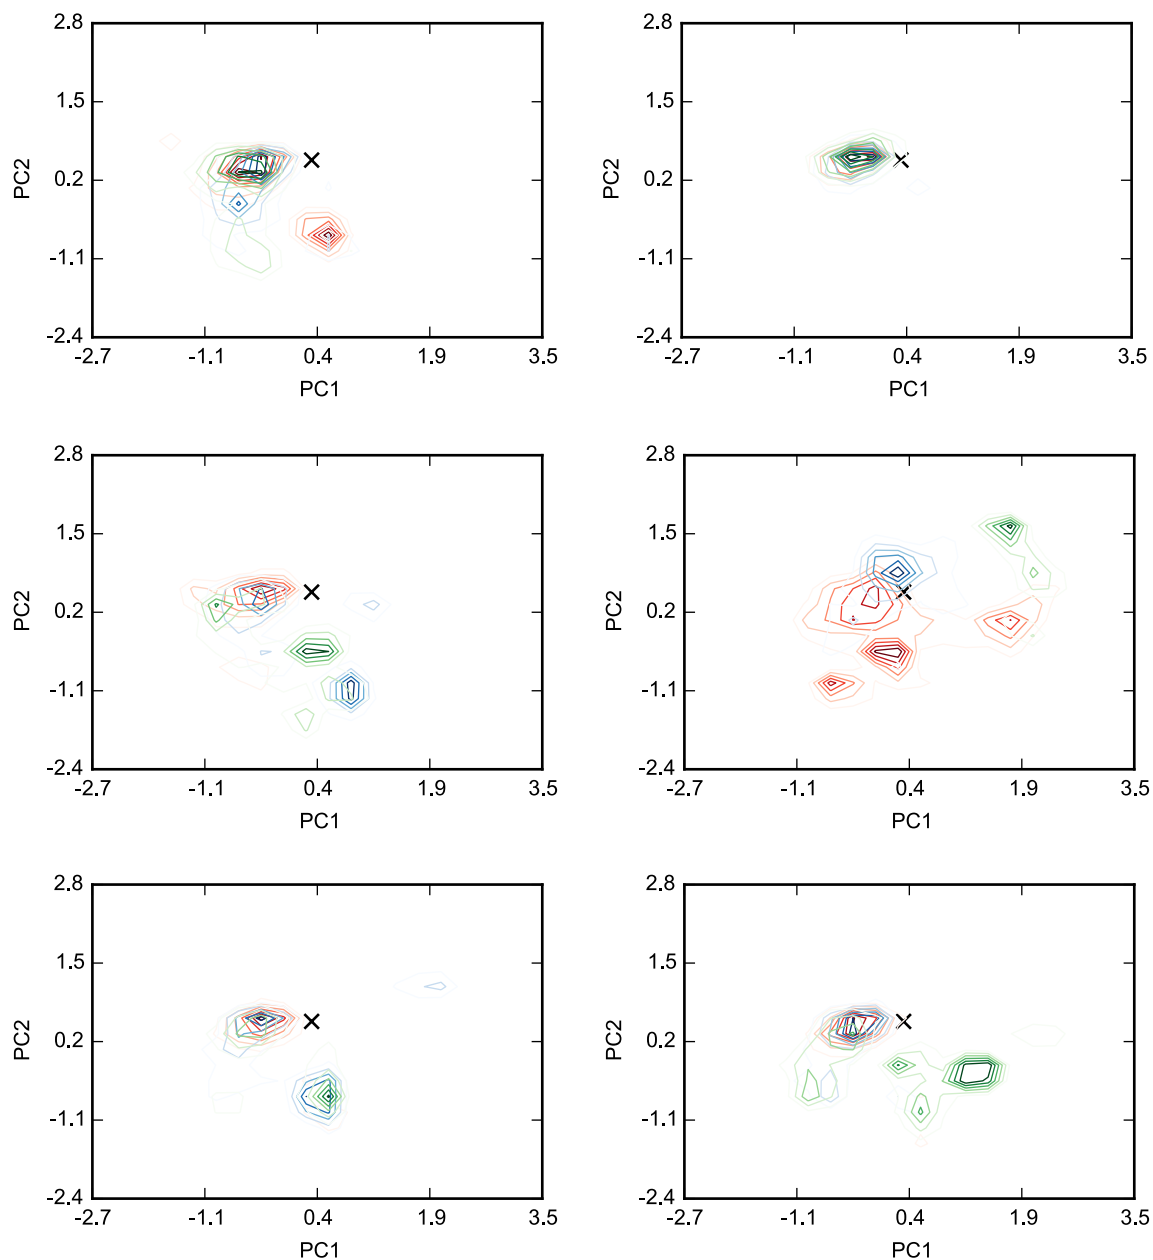

Figure S1: continued. **2D histograms of the first and second principal components** of the unbound (left column) and bound (right column) receptor conformations sampled by YANK for complexes between T4-lysozyme and 24 ligands. Principal components analysis was performed on snapshots from all YANK simulations for heavy atoms within 5 Å of Val 111 in PDB ID 3DMZ. Ligands on this page, from top to bottom, are allyl ethyl sulfide, hexafluorobenzene, indole.

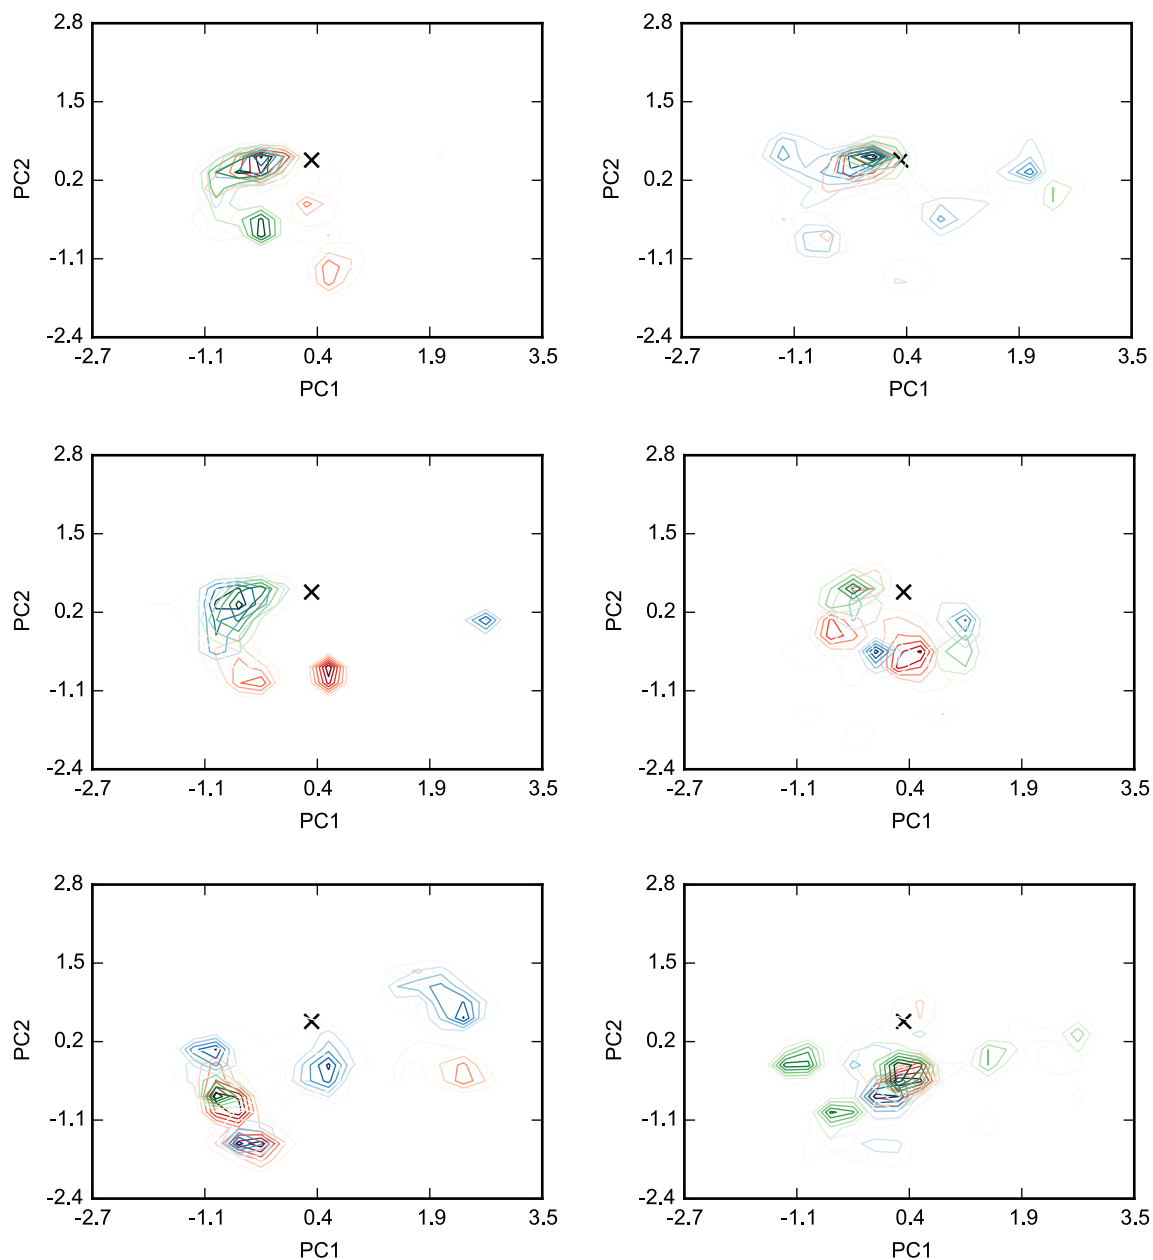

Figure S1: continued. **2D histograms of the first and second principal components** of the unbound (left column) and bound (right column) receptor conformations sampled by YANK for complexes between T4-lysozyme and 24 ligands. Principal components analysis was performed on snapshots from all YANK simulations for heavy atoms within 5 Å of Val 111 in PDB ID 3DMZ. Ligands on this page, from top to bottom, are m-xylene, n-hexylbenzene, nitrobenzene.



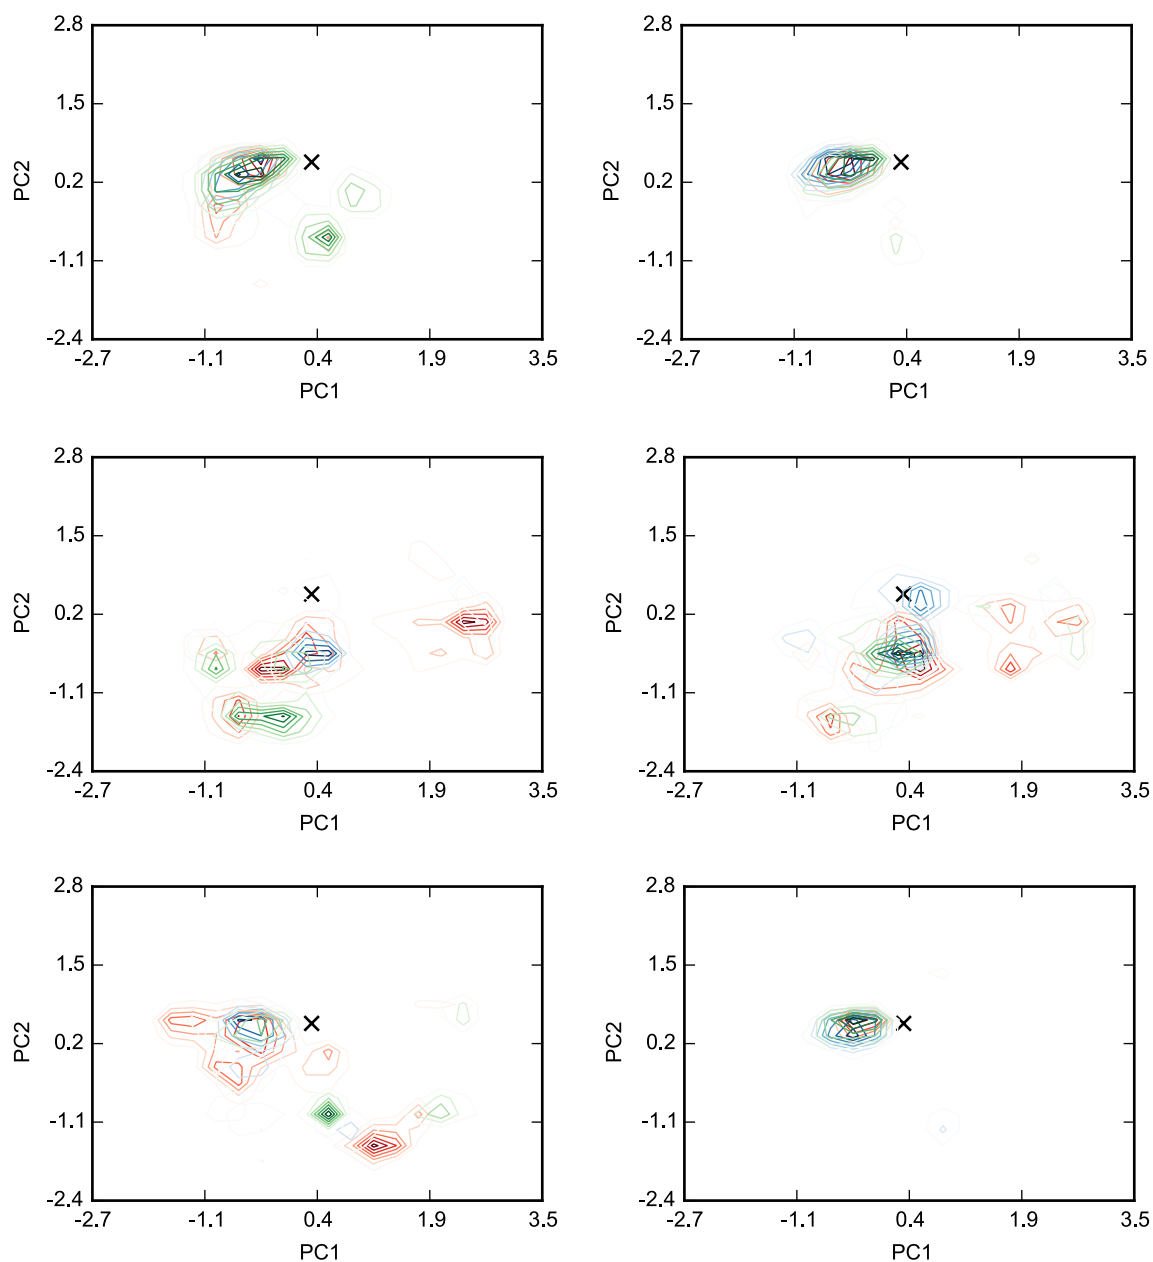

Figure S1: continued. **2D histograms of the first and second principal components** of the unbound (left column) and bound (right column) receptor conformations sampled by YANK for complexes between T4-lysozyme and 24 ligands. Principal components analysis was performed on snapshots from all YANK simulations for heavy atoms within 5 Å of Val 111 in PDB ID 3DMZ. Ligands on this page, from top to bottom, are ethanol, methanol, dimethyl-sulfoxide.

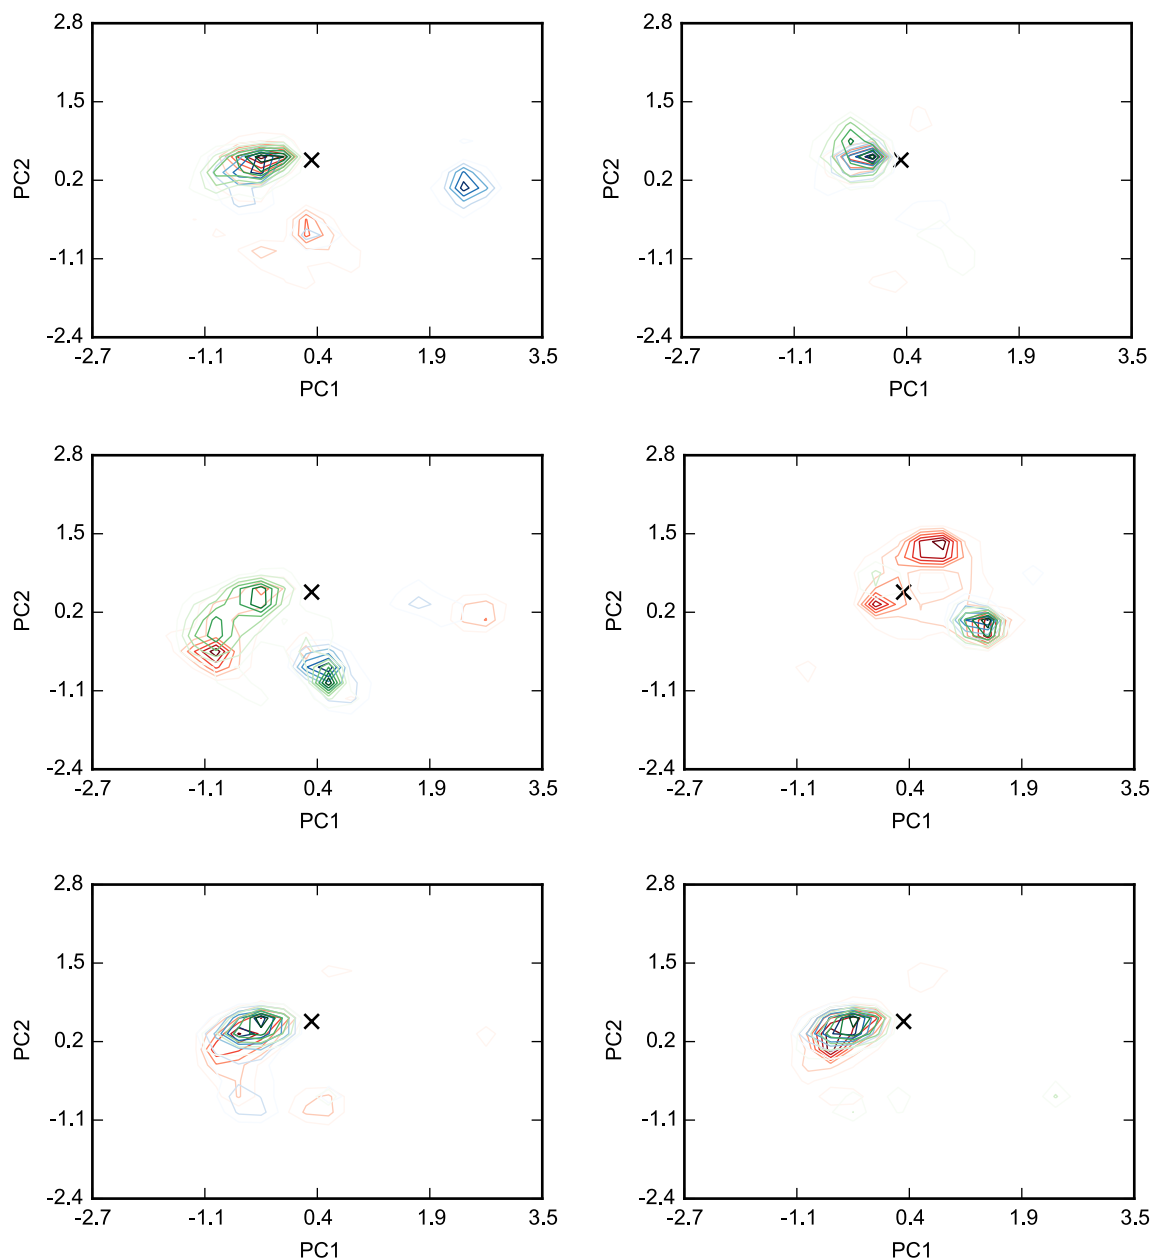

Figure S1: continued. **2D histograms of the first and second principal components** of the unbound (left column) and bound (right column) receptor conformations sampled by YANK for complexes between T4-lysozyme and 24 ligands. Principal components analysis was performed on snapshots from all YANK simulations for heavy atoms within 5 Å of Val 111 in PDB ID 3DMZ. Ligands on this page, from top to bottom, are 4-ethyltoluene, DL-camphor, 1-propanol.

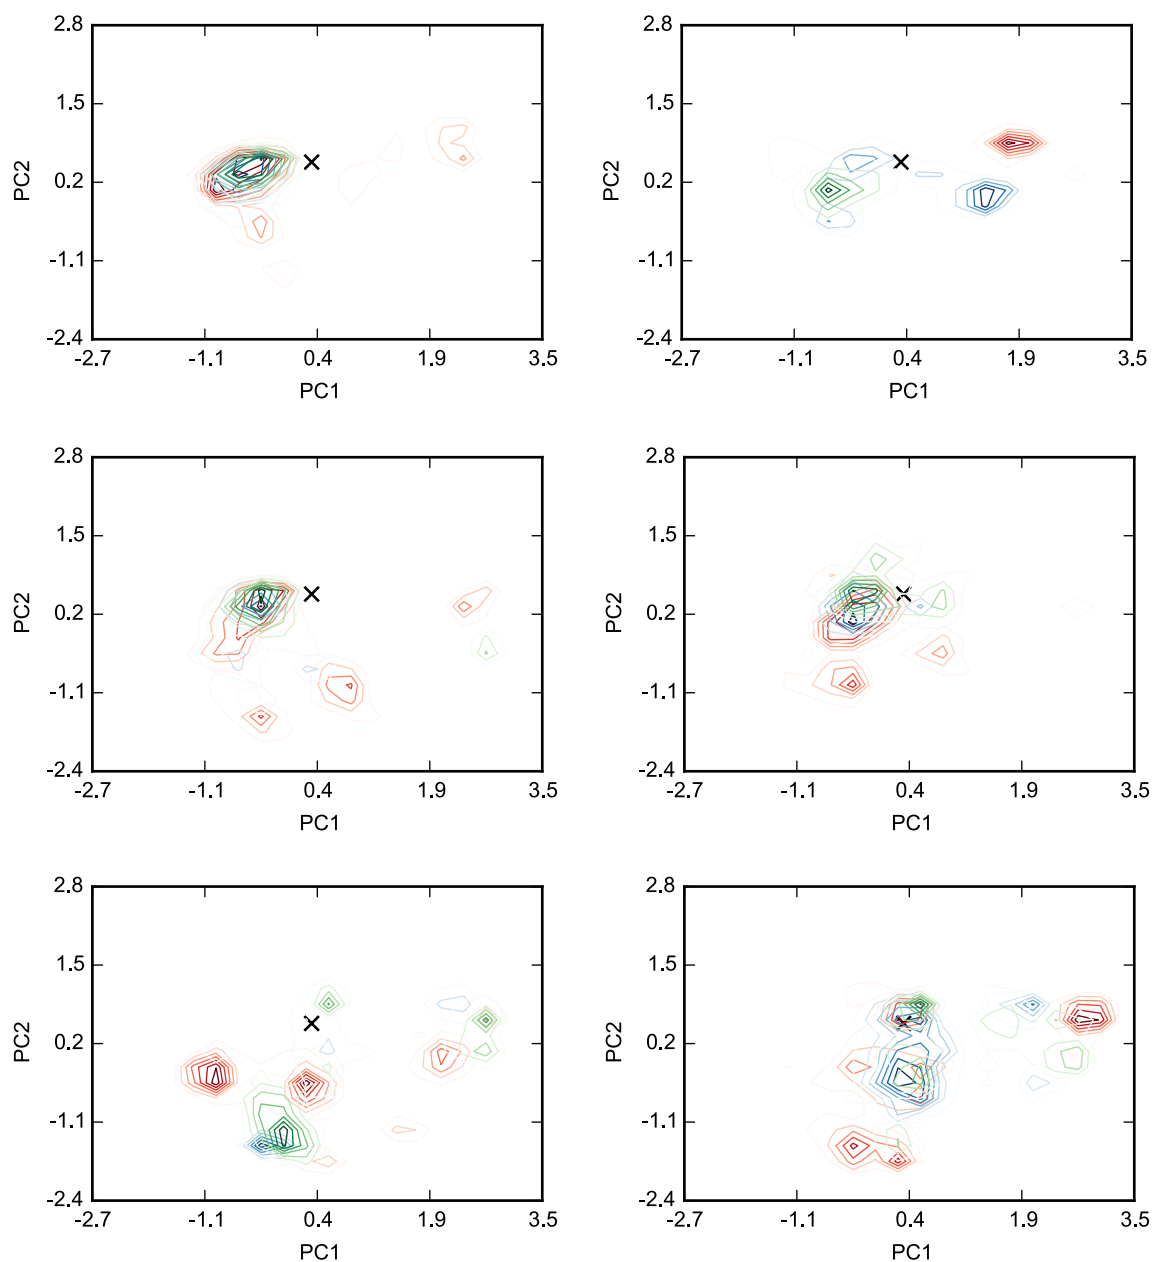

Figure S1: continued. **2D histograms of the first and second principal components** of the unbound (left column) and bound (right column) receptor conformations sampled by YANK for complexes between T4-lysozyme and 24 ligands. Principal components analysis was performed on snapshots from all YANK simulations for heavy atoms within 5 Å of Val 111 in PDB ID 3DMZ. Ligands on this page, from top to bottom, are 1,1-diethylurea, 1,4-diiodobenzene, 1,2-diiodobenzene.

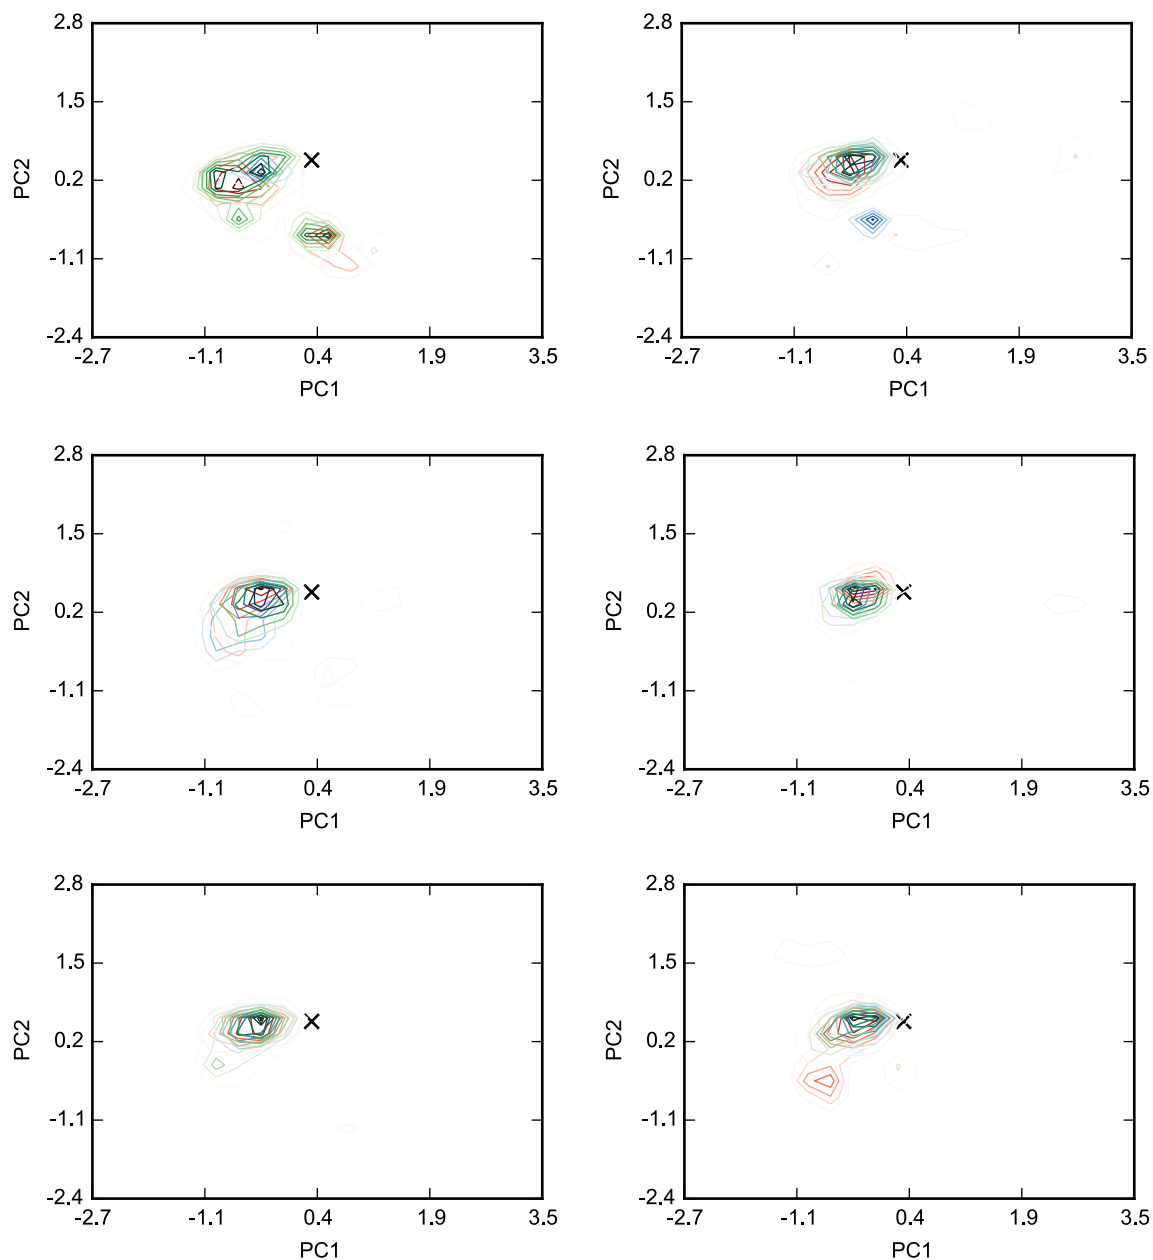

Figure S1: continued. **2D histograms of the first and second principal components** of the unbound (left column) and bound (right column) receptor conformations sampled by YANK for complexes between T4-lysozyme and 24 ligands. Principal components analysis was performed on snapshots from all YANK simulations for heavy atoms within 5 Å of Val 111 in PDB ID 3DMZ. Ligands on this page, from top to bottom, are 2-bromoethanol, 2-iodoethanol, benzyl-alcohol.

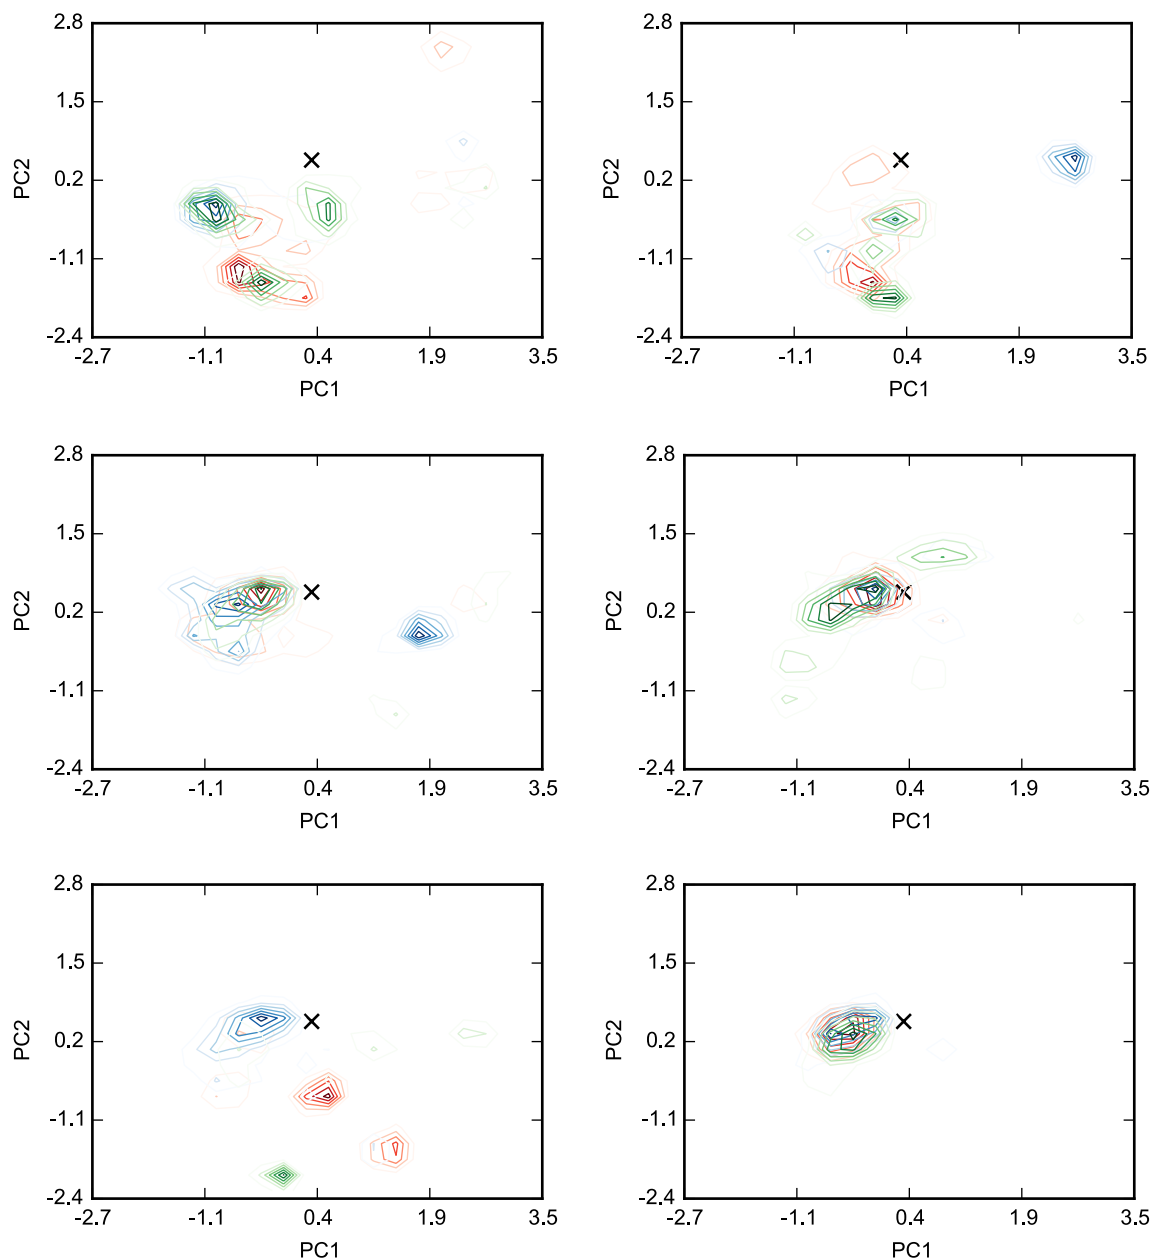

Figure S1: continued. **2D histograms of the first and second principal components** of the unbound (left column) and bound (right column) receptor conformations sampled by YANK for complexes between T4-lysozyme and 24 ligands. Principal components analysis was performed on snapshots from all YANK simulations for heavy atoms within 5 Å of Val 111 in PDB ID 3DMZ. Ligands on this page, from top to bottom, are benzaldehyde-oxime, p-xylene, phenol.

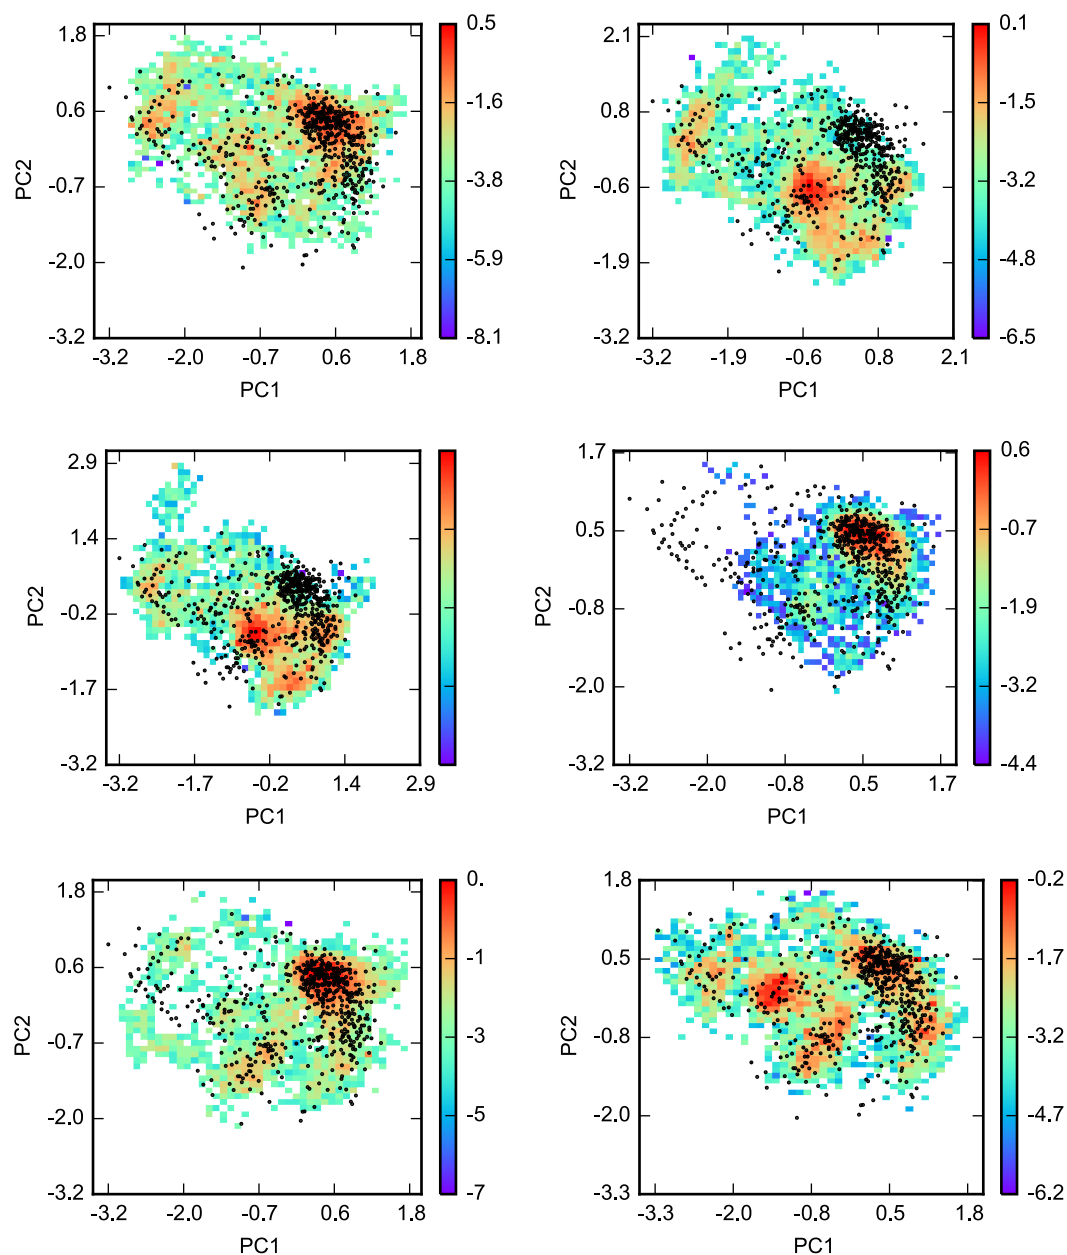

Figure S2: **Configuration space comparison** between YANK and AlGDock. Principal components analysis was performed on snapshots from all YANK simulations for heavy atoms within 5 Å of Val 111 in PDB ID 3DMZ. 2D histograms (plotted on a log scale) were created by projecting YANK snapshots on the first two PCs and weighting points by Eq. 5 of the main text. The black dots are projections of the 576 snapshots used in AlGDock calculations onto the same eigenvectors. Progressing from left to right and from the top to the bottom, the complexes have a decreasing absolute difference in binding free energy estimates between YANK and AlGDock. The ligand names are 1,1-diethylurea, methanol, benzaldehyde-oxime, ethanol, dimethyl-sulfoxide, and DL-camphor.

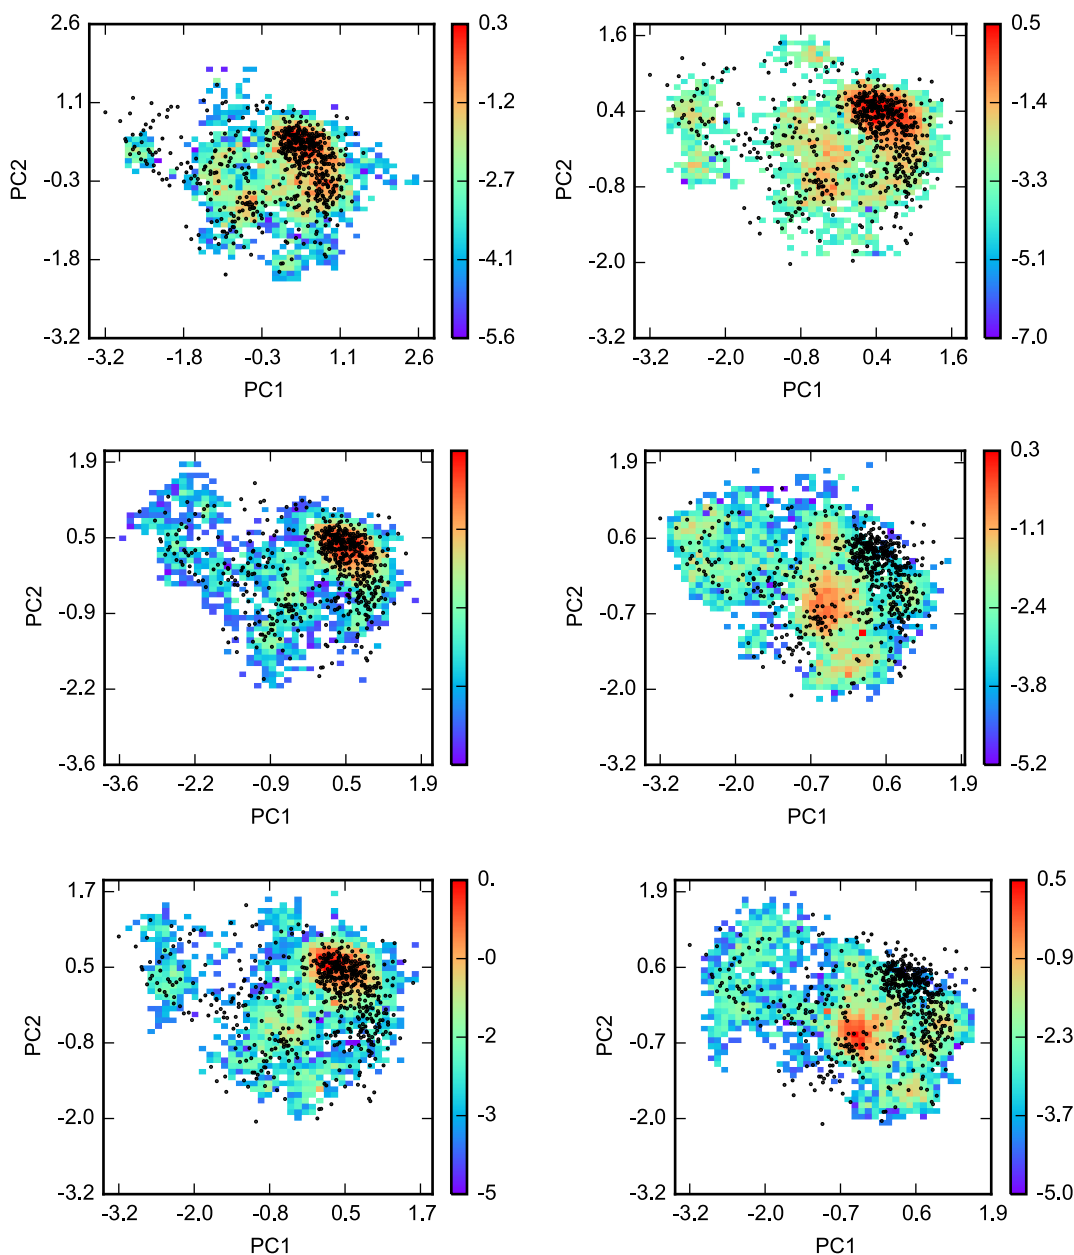

Figure S2: continued. **Configuration space comparison** between YANK and AlGDock. Principal components analysis was performed on snapshots from all YANK simulations for heavy atoms within 5 Å of Val 111 in PDB ID 3DMZ. 2D histograms (plotted on a log scale) were created by projecting YANK snapshots on the first two PCs and weighting points by Eq. 5 of the main text. The black dots are projections of the 576 snapshots used in AlGDock calculations onto the same eigenvectors. Progressing from left to right and from the top to the bottom, the complexes have a decreasing absolute difference in binding free energy estimates between YANK and AlGDock. The ligand names are n-hexylbenzene, 1-propanol, benzene, 1,2-diiodobenzene, 4-iodotoluene, and nitrobenzene.

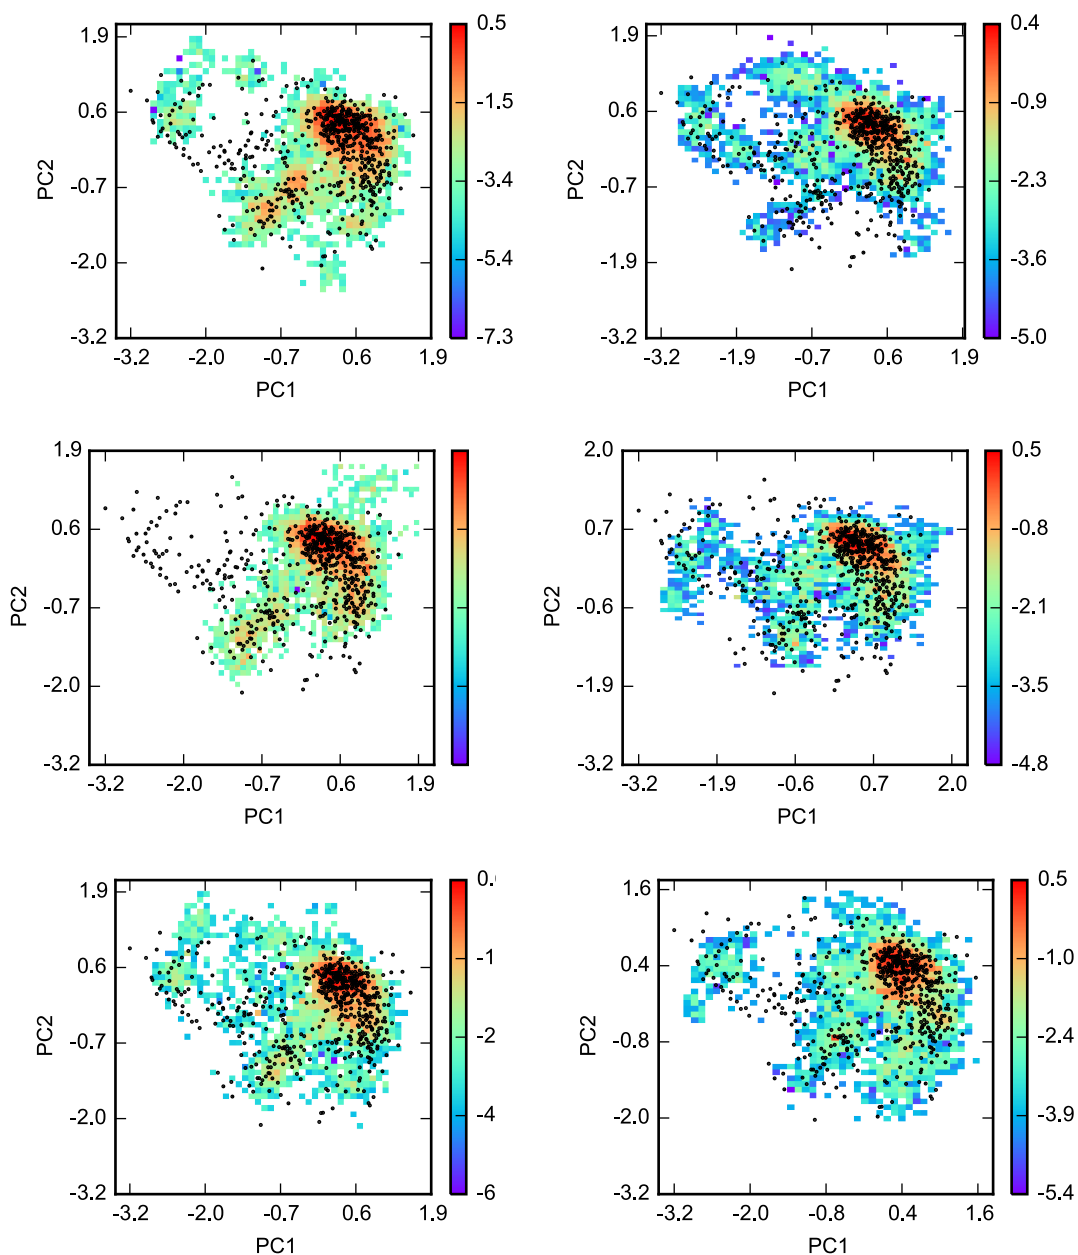

Figure S2: continued. **Configuration space comparison** between YANK and AlGDock. Principal components analysis was performed on snapshots from all YANK simulations for heavy atoms within 5 Å of Val 111 in PDB ID 3DMZ. 2D histograms (plotted on a log scale) were created by projecting YANK snapshots on the first two PCs and weighting points by Eq. 5 of the main text. The black dots are projections of the 576 snapshots used in AlGDock calculations onto the same eigenvectors. Progressing from left to right and from the top to the bottom, the complexes have a decreasing absolute difference in binding free energy estimates between YANK and AlGDock. The ligand names are 2-bromoethanol, p-xylene, benzyl-alcohol, m-xylene, 2-iodoethanol, and 1,4-diiodobenzene.



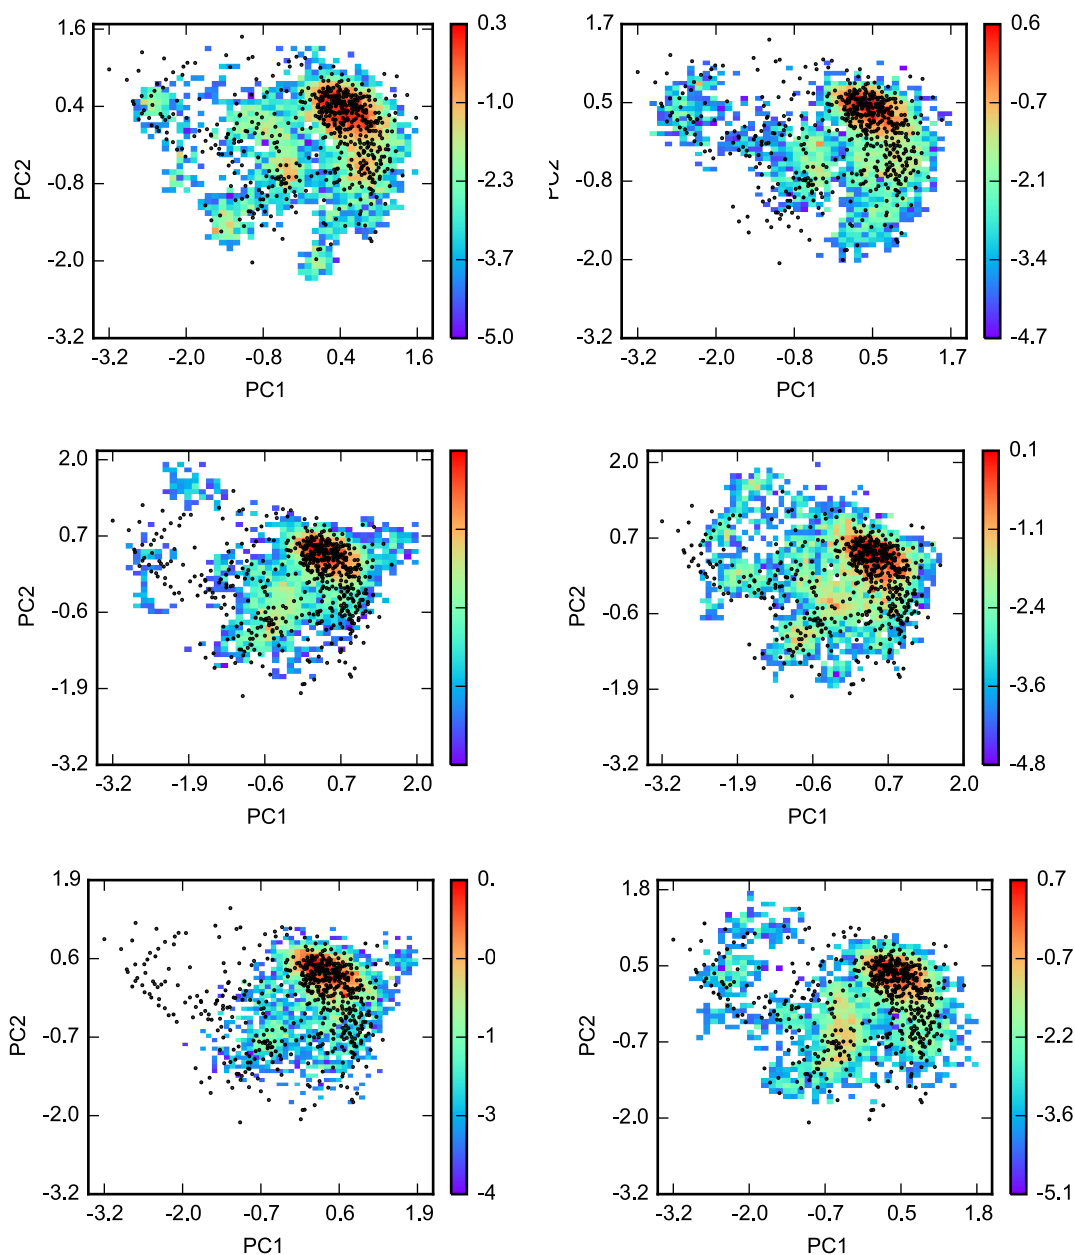

Figure S2: continued. **Configuration space comparison** between YANK and AlGDock. Principal components analysis was performed on snapshots from all YANK simulations for heavy atoms within 5 Å of Val 111 in PDB ID 3DMZ. 2D histograms (plotted on a log scale) were created by projecting YANK snapshots on the first two PCs and weighting points by Eq. 5 of the main text. The black dots are projections of the 576 snapshots used in AlGDock calculations onto the same eigenvectors. Progressing from left to right and from the top to the bottom, the complexes have a decreasing absolute difference in binding free energy estimates between YANK and AlGDock. The ligand names are phenol, 1-methylpyrrole, benzofuran, hexafluorobenzene, allyl ethyl sulfide, and indole.

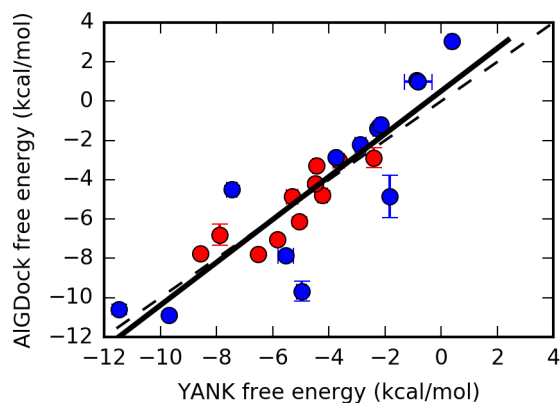

Figure S3: **Binding free energies for 24 ligands** estimated using YANK (x-axis) and AlGDock (y-axis). Only snapshots from YANK simulations with 4 active ligands were included. The snapshots were weighted with scheme (c).

Table S3: **Comparing AlGDock and YANK** binding free energy estimates. The AlGDock free energies were calculated using different weighting schemes. RMSE is in units of kcal/mol. In contrast to Table 1 of the main text, only BPMFs from simulations with active ligands were used.

|   | Full (24)         |            |            | Active (11) |            | Inactive (13) |            |
|---|-------------------|------------|------------|-------------|------------|---------------|------------|
|   | Linear Regression | RMSE       | R          | RMSE        | R          | RMSE          | R          |
| a | $y=1.06x+0.83$    | 1.82(0.21) | 0.87(0.01) | 1.25(0.19)  | 0.77(0.04) | 2.19(0.37)    | 0.88(0.04) |
| b | $y=1.07x+0.47$    | 1.83(0.24) | 0.86(0.01) | 1.35(0.23)  | 0.72(0.05) | 2.15(0.39)    | 0.88(0.03) |
| c | $y=1.09x+0.52$    | 1.75(0.22) | 0.87(0.01) | 0.89(0.11)  | 0.87(0.04) | 2.23(0.36)    | 0.87(0.04) |
| d | $y=1.10x+0.13$    | 1.87(0.31) | 0.87(0.02) | 1.07(0.20)  | 0.86(0.03) | 2.34(0.48)    | 0.87(0.04) |
| e | $y=1.19x+0.95$    | 1.52(0.18) | 0.92(0.02) | 0.95(0.36)  | 0.93(0.01) | 1.87(0.21)    | 0.92(0.03) |
| f | $y=1.19x+0.67$    | 1.50(0.21) | 0.93(0.02) | 1.04(0.31)  | 0.94(0.02) | 1.80(0.26)    | 0.92(0.03) |

Table S4: **Solvation and binding free energies for all 141 ligands.** The column labeled B indicates whether the ligand had thermal shift activity (Y) or not (N). The columns for solvation ( $\Delta G_{solv}$ ) and binding ( $\Delta G^\circ$ ) are experimental (E) or based on OBC2 (O) or PBSA (P) implicit solvent. Binding free energy estimates are based on AlGDock BPF estimates for 384 receptor snapshots weighted by scheme (c). Ligands are listed in order of increasing PBSA binding free energy estimate. All free energies are in units of kcal/mol.

| Ligand                         | B | $\Delta G_{solv}$ |       |       | $\Delta G^\circ$ |              |             |
|--------------------------------|---|-------------------|-------|-------|------------------|--------------|-------------|
|                                |   | E                 | O     | P     | E                | O            | P           |
| (+)-camphene                   | N |                   | 2.33  | 5.52  |                  | -10.13(1.10) | -6.8(1.90)  |
| n-propylbenzene                | Y | -2.13             | 0.26  | 2.66  | -6.55            | -7.78(0.22)  | -6.62(1.14) |
| methylcyclohexane              | Y |                   | 2.42  | 5.30  |                  | -7.66(0.28)  | -6.59(0.73) |
| cyclohexene                    | Y |                   | 1.46  | 3.52  |                  | -5.76(0.22)  | -5.96(0.47) |
| diisopropyl disulfide          | Y |                   | -0.87 | 3.32  |                  | -6.13(0.41)  | -5.87(1.47) |
| (-)-camphene                   | N |                   | 2.33  | 5.53  |                  | -8.34(0.92)  | -5.86(1.99) |
| 1,1-diethylurea                | N |                   | 0.81  | 2.11  |                  | -9.67(0.53)  | -5.61(0.59) |
| methyl ethyl cy-<br>clopentene | Y |                   | 2.49  | 5.15  |                  | -8.41(0.26)  | -5.48(0.35) |
| cyclohexane                    | N |                   | 2.12  | 4.61  |                  | -6.64(0.27)  | -5.32(0.26) |
| 6-methyl-1,5-<br>heptadiene    | Y |                   | 2.38  | 5.63  |                  | -7.72(0.24)  | -5.19(0.66) |
| 2-(methylthio)-<br>thiophene   | Y |                   | -0.85 | 0.84  |                  | -6.06(0.14)  | -5.16(0.65) |
| 1-phenyl-<br>semicarbazide     | N |                   | 0.16  | 0.36  |                  | -10.29(0.44) | -5.14(0.84) |
| dipropyl disulfide             | Y |                   | -0.10 | 3.88  |                  | -6.73(0.52)  | -4.93(0.82) |
| 4-ethyltoluene                 | Y | -1.65             | 0.56  | 2.70  | -5.42            | -7.80(0.18)  | -4.68(0.81) |
| 1,2-benzisoxazole              | Y |                   | -1.38 | -1.39 |                  | -6.94(0.10)  | -4.34(0.78) |
| isobutylbenzene                | Y | -2.83             | 0.52  | 3.44  | -6.51            | -7.55(0.18)  | -4.25(1.06) |
| amylbenzene                    | Y |                   | 0.88  | 4.24  |                  | -7.51(0.40)  | -4.25(0.94) |
| diethyl disulfide              | Y |                   | -1.04 | 1.97  |                  | -5.75(0.36)  | -4.08(0.32) |
| p-xylene                       | Y | -1.40             | 0.09  | 1.72  | -4.67            | -7.05(0.11)  | -3.97(0.78) |
| n-butylbenzene                 | Y | -2.91             | 0.57  | 3.45  | -6.70            | -7.52(0.32)  | -3.9(0.86)  |
| 2-ethyltoluene                 | Y | -1.65             | 0.33  | 2.41  | -4.56            | -7.57(0.25)  | -3.79(0.84) |
| toluene                        | Y | -0.82             | -0.51 | 0.90  | -5.52            | -4.80(0.12)  | -3.75(0.75) |
| 1-heptanol                     | N |                   | -2.35 | 0.50  |                  | -7.39(0.62)  | -3.56(1.05) |
| 1,2-dichlorobenzene            | Y |                   | -0.27 | 0.61  | -6.37            | -7.76(0.18)  | -3.55(0.50) |
| sec-butyl-benzene              | Y |                   | 0.57  | 3.57  |                  | -8.04(0.48)  | -3.5(0.82)  |
| 2-ethylfuran                   | Y |                   | -0.56 | 1.28  |                  | -4.97(0.16)  | -3.4(0.58)  |
| 1-vinylimidazole               | N |                   | -0.12 | -0.05 |                  | -5.86(0.09)  | -3.32(0.53) |
| indene                         | Y | -1.08             | -1.77 | -0.56 | -5.13            | -5.97(0.17)  | -3.29(0.53) |
| 2,1-benzisoxazole              | N |                   | -3.57 | -3.41 |                  | -5.88(0.12)  | -3.26(1.03) |
| 2-methylbenzofuran             | Y |                   | -2.86 | -1.86 |                  | -7.19(0.28)  | -3.19(1.30) |
| thioanisole                    | Y |                   | -1.24 | 0.67  |                  | -6.51(0.26)  | -3.18(0.53) |
| allyl n-propylether            | Y |                   | 0.21  | 2.35  |                  | -5.33(0.28)  | -3.12(0.61) |
| fluorobenzene                  | Y |                   | -0.87 | 0.69  |                  | -3.97(0.12)  | -3.09(0.40) |
| thianaphthene                  | Y | -1.35             | -2.39 | -1.32 | -5.71            | -6.03(0.19)  | -3.03(0.68) |
| benzofuran                     | Y | -1.24             | -3.87 | -3.25 | -5.46            | -4.85(0.12)  | -3.03(0.98) |
| 1-octanol                      | N |                   | -2.05 | 1.22  |                  | -5.42(0.18)  | -2.94(1.43) |

|                                 |   |       |       |       |       |              |             |
|---------------------------------|---|-------|-------|-------|-------|--------------|-------------|
| allyl ethyl sulfide             | Y |       | -0.48 | 2.09  |       | -4.78(0.21)  | -2.92(0.39) |
| phenyl azide                    | Y |       | -1.09 | -1.05 |       | -7.66(0.15)  | -2.89(0.69) |
| benzene                         | Y | 0.00  | -1.10 | 0.10  | -5.19 | -3.29(0.13)  | -2.85(0.63) |
| p-methylphenyl azide            | Y |       | -0.41 | -0.02 |       | -8.20(0.15)  | -2.82(0.81) |
| ethylbenzene                    | Y | -1.40 | -0.06 | 1.83  | -5.76 | -6.11(0.18)  | -2.77(0.42) |
| nitrosobenzene                  | N |       | -1.51 | -0.99 |       | -6.47(0.09)  | -2.73(0.47) |
| 1-phenyl-1-propyne              | Y |       | -0.78 | -0.10 |       | -8.74(0.37)  | -2.69(0.47) |
| m-xylene                        | Y | -1.38 | 0.11  | 1.76  | -4.75 | -6.12(0.22)  | -2.56(0.36) |
| isobutane                       | N |       | 2.30  | 4.43  |       | -3.86(0.19)  | -2.47(0.20) |
| 3-ethyltoluene                  | Y | -2.01 | 0.56  | 2.73  | -5.12 | -7.48(0.22)  | -2.44(1.09) |
| tert-butylbenzene               | N |       | 0.33  | 3.00  |       | -9.19(0.78)  | -2.38(0.73) |
| 3-methyl benzyl azide           | Y |       | -0.86 | -0.34 |       | -9.11(0.19)  | -2.23(0.95) |
| cis-3-hexenyl formate           | Y |       | -3.11 | 0.06  |       | -5.70(0.33)  | -2.22(0.85) |
| allyl sulfide                   | Y |       | -0.44 | 2.33  |       | -5.13(0.22)  | -2.19(0.43) |
| benzaldehyde-oxime              | N |       | 0.29  | 0.87  |       | -7.86(0.15)  | -2.18(0.36) |
| nitrobenzene                    | Y |       | -2.91 | -2.87 |       | -7.74(0.13)  | -2.15(0.62) |
| 2-fluoro-aniline                | N |       | -5.54 | -3.86 |       | -2.36(0.13)  | -2.08(0.94) |
| styrene                         | Y |       | -1.01 | 0.30  |       | -5.21(0.13)  | -2.06(0.41) |
| pentafluorophenyl-azide         | N |       | -0.37 | 1.06  |       | -6.67(0.56)  | -2.05(0.88) |
| indole                          | Y | -0.02 | -5.26 | -4.97 | -4.89 | -4.20(0.16)  | -1.94(0.92) |
| 2,5-dimethylfuran               | N |       | -0.59 | 1.14  |       | -4.97(0.12)  | -1.79(0.38) |
| 2-fluoroaniline                 | N |       | -5.56 | -3.91 |       | -2.26(0.13)  | -1.78(0.85) |
| 3-phenyl-1-propanethiol         | Y |       | -2.69 | 0.04  |       | -6.57(0.25)  | -1.73(0.57) |
| anisole                         | Y |       | -2.53 | -1.20 |       | -4.89(0.13)  | -1.69(0.41) |
| 1,2,4-triazolo[1,5-A]pyrimidine | N |       | -5.45 | -6.26 |       | -6.66(0.10)  | -1.66(0.66) |
| 2,4-difluoro-aniline            | N |       | -5.01 | -3.02 |       | -2.97(0.16)  | -1.6(0.78)  |
| 1-methylpyrrole                 | Y |       | -2.37 | -1.45 | -4.44 | -3.01(0.11)  | -1.55(0.42) |
| 4-(methylthio)nitrobenzene      | Y |       | -2.65 | -1.88 |       | -10.14(0.35) | -1.54(0.51) |
| phenylacetylene                 | Y |       | -1.18 | -0.81 |       | -7.61(0.13)  | -1.45(1.07) |
| dibutyl-disulfide               | N |       | 0.57  | 5.55  |       | -5.39(0.39)  | -1.42(0.54) |
| hexafluorobenzene               | Y |       | 0.48  | 3.32  |       | -2.89(0.46)  | -1.4(0.40)  |
| naphthalene                     | Y |       | -2.25 | -1.26 |       | -6.81(0.31)  | -1.13(0.43) |
| 2,4-difluoro-phenol             | N |       | -3.85 | -2.13 |       | -3.35(0.15)  | -1.01(0.48) |
| benzyl mercaptan                | Y |       | -2.98 | -1.39 |       | -4.75(0.14)  | -0.95(0.48) |
| 3,5-dichloroanisole             | N |       | -0.82 | 0.34  |       | -8.51(0.69)  | -0.92(0.86) |
| azulene                         | N |       | -2.74 | -1.65 |       | -6.06(0.33)  | -0.91(0.65) |
| o-xylene                        | Y | -1.35 | -0.10 | 1.46  | -4.60 | -6.15(0.21)  | -0.89(0.54) |
| $\beta$ -chlorophenetole        | Y |       | -3.22 | -1.44 |       | -6.59(0.19)  | -0.75(0.70) |
| 2-ethoxyphenol                  | Y |       | -4.40 | -2.83 |       | -5.90(0.24)  | -0.65(0.70) |
| 2,6-difluorophenyl azide        | N |       | -1.52 | -0.46 |       | -6.39(0.21)  | -0.62(0.52) |
| 2-(thienylthio)-acetone         | Y |       | -5.75 | -3.34 |       | -5.68(0.34)  | -0.58(0.57) |

|                                   |   |       |       |       |              |             |
|-----------------------------------|---|-------|-------|-------|--------------|-------------|
| p-cresol                          | N | -5.22 | -4.30 |       | -4.11(0.11)  | -0.56(0.88) |
| 4-iodotoluene                     | Y | -0.71 | -3.69 |       | -9.41(0.12)  | -0.51(1.00) |
| mesitylene                        | N | 0.76  | 2.73  |       | -6.35(0.66)  | -0.5(1.28)  |
| 3-methylrrole                     | N | -4.04 | -3.33 |       | -2.09(0.10)  | -0.43(0.35) |
| aniline                           | N | -6.01 | -4.80 |       | -1.35(0.12)  | -0.22(0.52) |
| quinoline                         | N | -4.92 | -3.94 |       | -6.16(0.23)  | -0.15(0.50) |
| 3,5-difluoro-aniline              | N | -4.95 | -3.10 |       | -2.81(0.21)  | -0.15(0.61) |
| furan                             | N | -1.31 | -0.44 |       | -2.08(0.11)  | -0.13(0.32) |
| phenol                            | N | -5.89 | -5.13 |       | -2.21(0.11)  | -0.02(0.54) |
| 2,6-difluorobenzyl<br>bromide     | Y | -1.49 | -1.45 |       | -7.52(0.20)  | 0.02(0.33)  |
| methyl chlorodifluo-<br>roacetate | N | -4.81 | -1.49 |       | -0.61(0.21)  | 0.09(0.22)  |
| pyridine                          | N | -4.65 | -3.79 |       | -1.63(0.10)  | 0.16(0.51)  |
| pentafluoroaniline                | N | -3.97 | -1.38 |       | -2.83(0.40)  | 0.24(0.50)  |
| 2-methylbenzyl alco-<br>hol       | N | -4.31 | -3.35 |       | -5.04(0.18)  | 0.26(0.46)  |
| 3-phenyl-1-propanol               | Y | -4.95 | -3.05 |       | -5.38(0.20)  | 0.27(0.57)  |
| 2-<br>fluorobenzaldehyde          | N | -5.44 | -3.13 |       | -3.50(0.17)  | 0.32(0.60)  |
| 3-fluorobenzonitrile              | N | -3.95 | -3.14 |       | -6.38(0.12)  | 0.34(0.26)  |
| DL-camphor                        | N | -2.43 | 1.64  |       | -4.49(0.29)  | 0.45(1.35)  |
| 2-phenylpropanol                  | Y | -4.40 | -2.46 |       | -5.92(0.61)  | 0.73(0.88)  |
| 6,7-<br>ifluorobenzotriazole      | N | -     | -     |       | -3.81(0.25)  | 0.77(0.99)  |
| 10.61 10.33<br>benzyl-alcohol     | N | -5.12 | -4.35 |       | -2.85(0.13)  | 0.77(0.57)  |
| n-methylaniline                   | Y | -4.32 | -3.60 | -4.70 | -3.49(0.12)  | 0.79(0.42)  |
| 3-chlorophenol                    | N | -5.13 | -4.57 |       | -4.48(0.17)  | 0.8(0.37)   |
| n-hexylbenzene                    | Y | 1.17  | 5.03  |       | -6.79(0.58)  | 0.86(0.60)  |
| iodopentafluorobenzene            | Y | 0.64  | -1.20 | -4.45 | -7.02(0.44)  | 0.88(0.96)  |
| 4-vinylpyridine                   | N | -4.49 | -3.51 |       | -3.72(0.14)  | 0.89(0.56)  |
| n,n'-dimethylaniline              | N | -2.57 | -2.34 |       | -4.30(0.17)  | 1.05(0.71)  |
| D-camphor                         | N | -2.40 | 1.67  |       | -4.27(0.41)  | 1.13(1.76)  |
| 1-<br>methylnaphthalene           | N | -1.67 | -0.40 |       | -7.11(0.59)  | 1.19(0.78)  |
| 2-iodotoluene                     | Y | -0.79 | -3.54 |       | -8.37(0.20)  | 1.24(0.48)  |
| iodobenzene                       | Y | -1.30 | -4.62 | -5.95 | -7.56(0.17)  | 1.45(0.56)  |
| 3-iodotoluene                     | Y | -0.64 | -3.55 |       | -8.61(0.22)  | 1.49(0.65)  |
| 2-phenoxyethanol                  | N | -5.72 | -4.28 |       | -4.60(0.24)  | 1.5(0.63)   |
| bromoethane                       | Y | -0.16 | -1.74 |       | -2.96(0.10)  | 1.59(0.22)  |
| benzaldehyde                      | N | -6.51 | -4.62 |       | -2.74(0.11)  | 1.6(0.36)   |
| 1,6-naphthyridine                 | N | -8.05 | -7.56 |       | -3.83(0.15)  | 1.85(0.67)  |
| 1-propanol                        | N | -3.61 | -2.46 |       | -4.86(1.09)  | 2.01(0.19)  |
| 3-<br>methoxymethylindole         | N | -5.16 | -4.68 |       | -7.64(0.52)  | 2.57(0.64)  |
| 5-bromopyrimidine                 | N | -5.77 | -7.71 |       | -2.75(0.09)  | 2.84(0.45)  |
| 2-iodopropane                     | Y | -2.27 | -4.85 |       | -3.67(0.20)  | 3.25(0.26)  |
| ethanol                           | N | -4.09 | -3.32 |       | 1.05(0.10)   | 3.3(0.22)   |
| N-heptylbenzene                   | N | 1.46  | 5.80  |       | -12.50(1.64) | 3.5(0.95)   |
| 8-aminoquinoline                  | N | -8.80 | -7.50 |       | -3.50(0.33)  | 3.54(0.52)  |

|                                      |   |        |        |              |             |
|--------------------------------------|---|--------|--------|--------------|-------------|
| 2-benzylpyridine                     | N | -5.05  | -2.70  | -8.84(1.37)  | 3.62(0.93)  |
| allyl ethyl sulfoxide                | Y | -      | -8.19  | 0.94(0.26)   | 3.74(0.61)  |
|                                      |   | 12.63  |        |              |             |
| acenaphthylene                       | N | -3.71  | -2.99  | -6.34(0.74)  | 3.83(0.83)  |
| trans-cinnamaldehyde                 | N | -6.92  | -4.86  | -4.13(0.45)  | 4.13(0.24)  |
| 1-naphthalenemethanol                | N | -5.44  | -4.74  | -5.84(0.70)  | 4.15(0.78)  |
| iodoethane                           | Y | -2.70  | -5.98  | -2.50(0.10)  | 4.71(0.20)  |
| dimethyl-sulfoxide                   | N | -8.62  | -7.47  | 0.98(0.17)   | 4.85(0.21)  |
| methanol                             | N | -4.78  | -4.17  | 3.05(0.08)   | 4.88(0.15)  |
| 1,2-diiodobenzene                    | N | -1.27  | -8.59  | -9.59(0.50)  | 6.26(1.19)  |
| 1,4-diiodobenzene                    | N | -1.23  | -9.01  | -10.46(0.38) | 5.48(1.05)  |
| 2,5-diaminophenol                    | N | -      | -      | 0.88(0.19)   | 5.09(0.91)  |
|                                      |   | 14.48  | 13.75  |              |             |
| 2-bromoethanol                       | N | -5.49  | -7.37  | -0.87(0.10)  | 5.15(0.23)  |
| 2-(methylsulfanyl)-4-quinazolinamine | N | -8.28  | -8.55  | -5.13(0.62)  | 5.35(0.78)  |
| 4-hydrazinothieno[2,3-D]pyrimidine   | N | -      | -      | -0.98(0.29)  | 6.97(0.69)  |
|                                      |   | 13.00  | 12.70  |              |             |
| 2-iodoethanol                        | N | -7.70  | -      | -0.44(0.11)  | 8.14(0.22)  |
|                                      |   |        | 11.25  |              |             |
| benzoic-acid                         | N | -      | -      | 2.87(0.65)   | 14.45(1.47) |
|                                      |   | 77.35  | 75.10  |              |             |
| thiophenol                           | Y | -      | -      | 2.32(0.76)   | 16.24(0.72) |
|                                      |   | 71.46  | 68.21  |              |             |
| thiophene-2-thiol                    | Y | -      | -      | 1.70(0.44)   | 16.31(0.79) |
|                                      |   | 67.00  | 64.79  |              |             |
| 2-amino-4-hydroxypteridine           | N | -      | -      | -0.09(0.82)  | 16.45(0.87) |
|                                      |   | 24.63  | 27.44  |              |             |
| 1,2-benzenedithiol                   | Y | -      | -      | 18.14(0.25)  | 38.64(2.53) |
|                                      |   | 232.92 | 226.54 |              |             |
| chloroform                           | N | inf    | inf    | inf(nan)     | inf(nan)    |

Table S5: **AmberTools radii versus Bondi radii.** A comparison of binding free energies for molecules containing chlorine, bromine, or iodine from experiment ( $\Delta G_{exp}^{\circ}$ ), based on radii from AmberTools ( $\Delta G_{AT}^{\circ}$ ), or based on Bondi radii ( $\Delta G_{Bondi}^{\circ}$ ). (AmberTools incorrectly specifies the Bondi radii of most halogens at 1.5 Å.) The columns specify whether estimates are based on OBC2 (O) or PBSA (P) implicit solvent. The column labeled B indicates whether the ligand had thermal shift activity (Y) or not (N).

| Ligand name                  | B | $\Delta G_{exp}^{\circ}$ | $\Delta G_{AT}^{\circ}$ |       | $\Delta G_{Bondi}^{\circ}$ |       |
|------------------------------|---|--------------------------|-------------------------|-------|----------------------------|-------|
|                              |   | E                        | O                       | P     | O                          | P     |
| 1,2-dichlorobenzene          | Y | -6.37                    | -7.78                   | -2.49 | -7.76                      | -3.55 |
| $\beta$ -chlorophenetole     | Y |                          | -6.62                   | -0.81 | -6.59                      | -0.75 |
| 3,5-dichloroanisole          | N |                          | -8.57                   | -0.94 | -8.51                      | -0.92 |
| methyl chlorodifluoroacetate | N |                          | -0.64                   | 0.75  | -0.61                      | 0.09  |
| 3-chlorophenol               | N |                          | -4.49                   | 1.57  | -4.48                      | 0.8   |
| chloroform                   | N |                          | inf                     | inf   | inf                        | inf   |
| bromoethane                  | Y |                          | -3.25                   | 2.61  | -2.96                      | 1.59  |
| 2,6-difluorobenzyl bromide   | Y |                          | -7.96                   | -0.10 | -7.52                      | 0.02  |
| 5-bromopyrimidine            | N |                          | -2.88                   | 3.89  | -2.75                      | 2.84  |
| 2-bromoethanol               | N |                          | -1.21                   | 5.72  | -0.87                      | 5.15  |
| iodoethane                   | Y |                          | -3.13                   | 5.49  | -2.50                      | 4.71  |
| 2-iodopropane                | Y |                          | -4.45                   | 3.84  | -3.67                      | 3.25  |
| 2-iodotoluene                | Y |                          | -8.84                   | 1.29  | -8.37                      | 1.24  |
| 3-iodotoluene                | Y |                          | -8.95                   | 1.56  | -8.61                      | 1.49  |
| 4-iodotoluene                | Y |                          | -9.60                   | 1.42  | -9.41                      | -0.51 |
| iodobenzene                  | Y | -5.95                    | -7.72                   | 2.91  | -7.56                      | 1.45  |
| 1,4-diiodobenzene            | N |                          | -10.90                  | 5.27  | -10.46                     | 5.48  |
| 1,2-diiodobenzene            | N |                          | -10.61                  | 4.82  | -9.59                      | 6.26  |
| 2-iodoethanol                | N |                          | -1.40                   | 7.66  | -0.44                      | 8.14  |

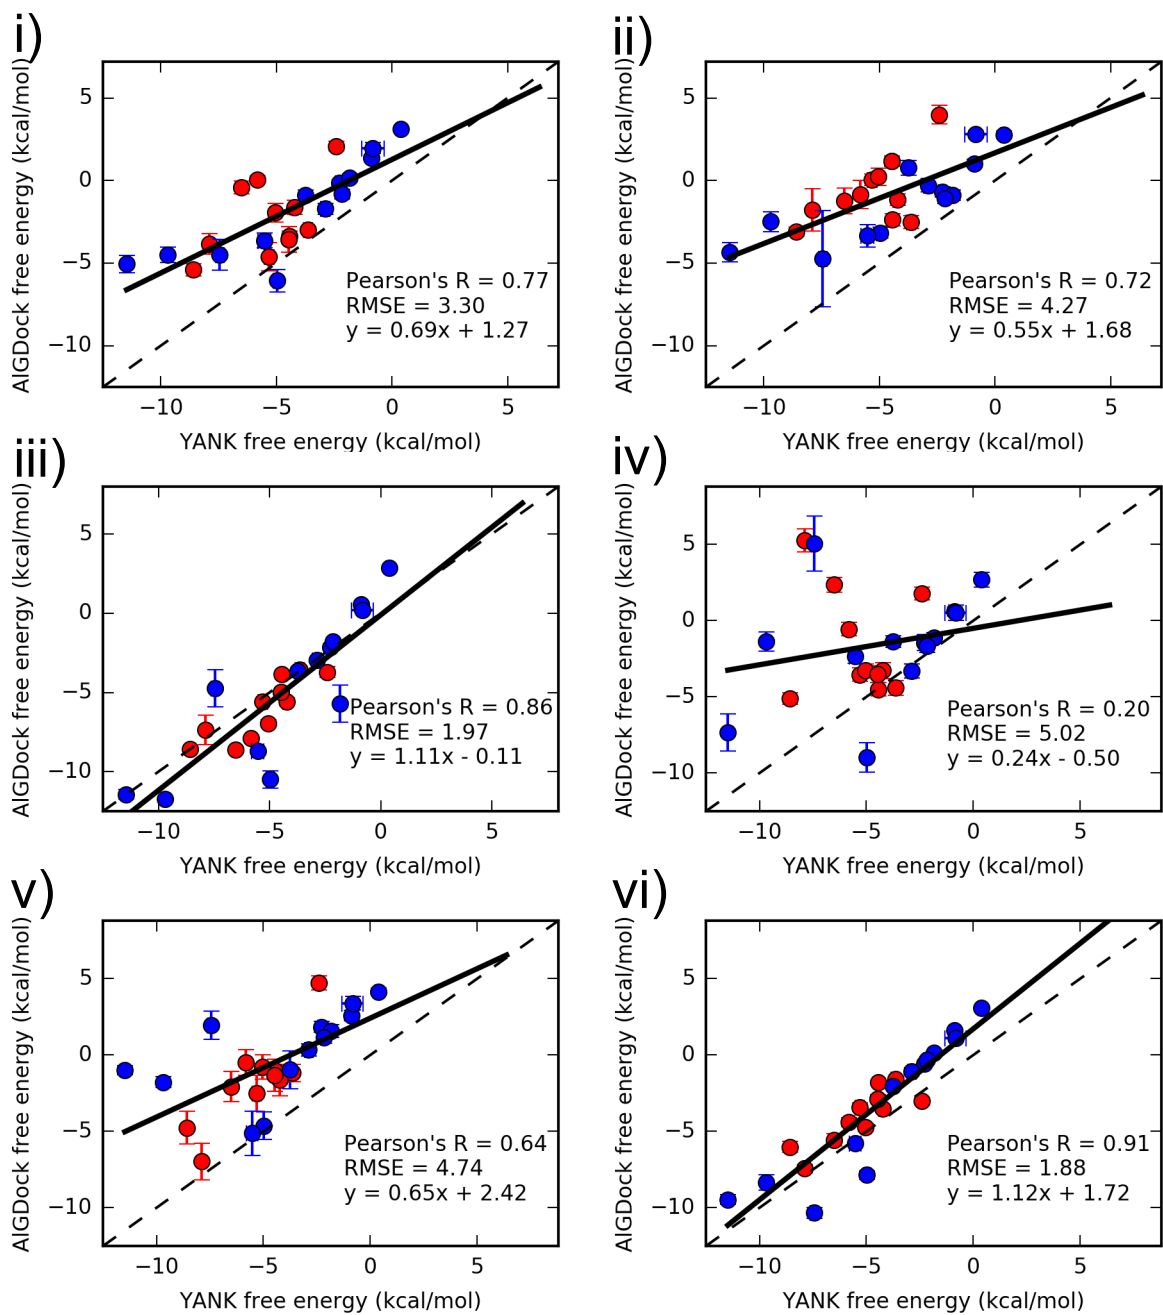

Figure S4: **Binding free energies for 24 ligands** estimated using YANK (x-axis) and AlGDock (y-axis). The AlGDock free energies were calculated using sets of receptor snapshots obtained from separate YANK simulations for ligands (i) to (vi) in complex with T4 Lysozyme.



Table S6: **Comparison of measured and calculated binding free energies.** Previously reported values include isothermal titration calorimetry measurements from Morton et al.<sup>2</sup>, Mobley et al.<sup>3</sup>, and Liu et al.<sup>4</sup> ( $\Delta G_{exp}$ ) and estimates from Mobley et al.<sup>3</sup> (M), Gallicchio et al.<sup>5</sup> (G), Purisima and Hogues<sup>6</sup> (P), and Ucisik et al.<sup>7</sup> (U). AlGDock BPFM estimates were weighted by scheme (c). All free energies are in units of kcal/mol.

| Ligand name            | $\Delta G_{exp}$ | M     | G     | P     | U      | OBC2  | PBSA  |
|------------------------|------------------|-------|-------|-------|--------|-------|-------|
| benzofuran             | -5.46            | -3.53 |       | -6.99 | -15.51 | -4.85 | -3.03 |
| benzene                | -5.19            | -4.56 | -4.01 | -5.32 | -10.45 | -3.29 | -2.85 |
| ethylbenzene           | -5.76            | -6.36 |       |       |        | -6.11 | -2.77 |
| indene                 | -5.13            | -1.75 |       | -5.14 | -15.86 | -5.97 | -3.29 |
| indole                 | -4.89            | -0.42 | -3.75 | -3.47 | -14.04 | -4.20 | -1.94 |
| iodobenzene            | -5.95            |       |       |       |        | -7.56 | 1.45  |
| iodopentafluorobenzene | -4.45            |       |       |       |        | -7.02 | 0.88  |
| isobutylbenzene        | -6.51            | -5.01 | -5.21 | -7.35 | -19.90 | -7.55 | -4.25 |
| N-butylbenzene         | -6.70            | -4.87 |       | -7.50 | -19.84 | -7.52 | -3.90 |
| N-propylbenzene        | -6.55            | -5.88 |       |       |        | -7.78 | -6.62 |
| o-xylene               | -4.60            | -1.27 |       | -3.38 | -13.68 | -6.15 | -0.89 |
| p-xylene               | -4.67            | -3.54 |       | -3.63 | -13.98 | -7.05 | -3.97 |
| toluene                | -5.52            | -4.58 | -3.80 |       |        | -4.80 | -3.75 |
| 1-methylpyrrole        | -4.44            | -4.32 |       |       |        | -3.01 | -1.55 |
| 1,2-dichlorobenzene    | -6.37            | -5.66 |       |       |        | -7.76 | -3.55 |
| N-methylaniline        | -4.7             | -5.37 |       |       |        | -3.49 | 0.79  |
| m-xylene               | -4.75            |       |       |       |        | -6.12 | -2.56 |
| 2-ethyltoluene         | -4.56            |       |       |       |        | -7.57 | -3.79 |
| 3-ethyltoluene         | -5.12            |       |       |       |        | -7.48 | -2.44 |
| 4-ethyltoluene         | -5.42            |       |       |       |        | -7.80 | -4.68 |
| thianaphthene          | -5.71            |       |       |       |        | -6.03 | -3.03 |

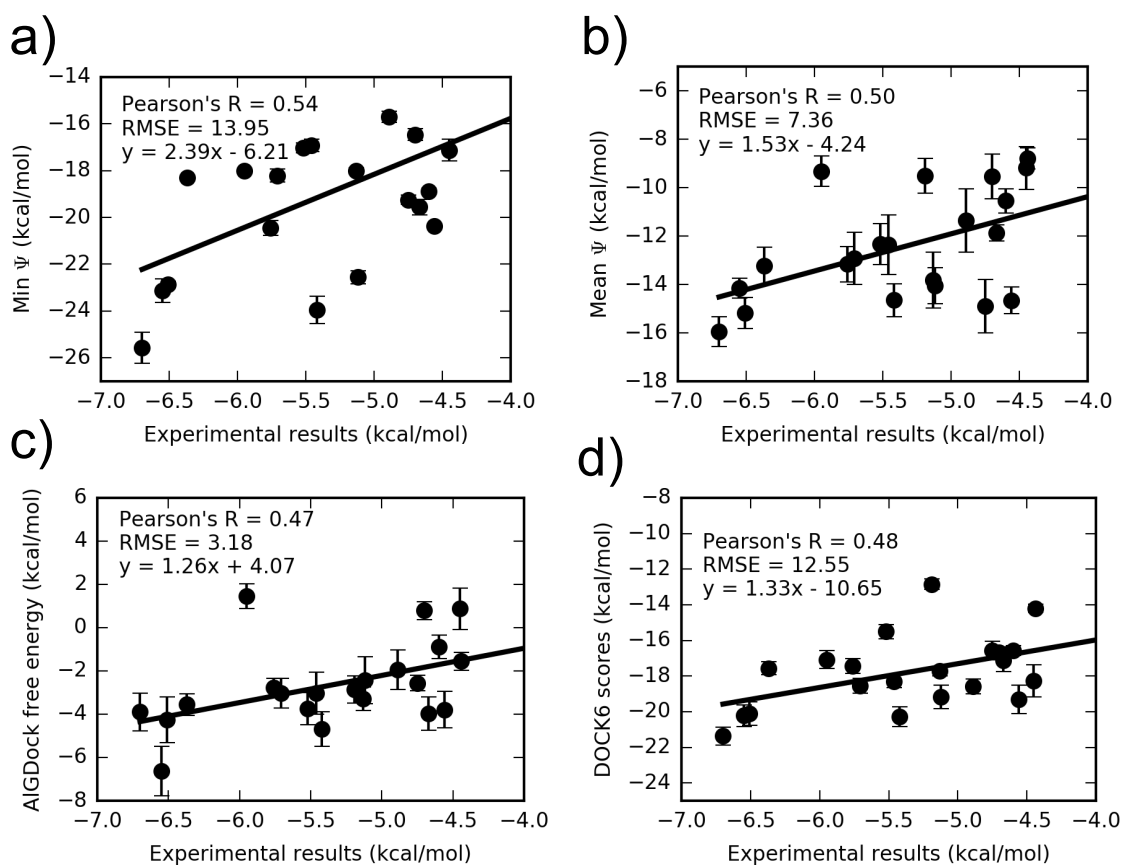

Figure S5: **Comparing different free energy estimates with experiment.** AlGDock free energy estimates in PBSA implicit solvent were based on BPFs calculated with either the (a) minimum interaction energy, (b) mean interaction energy, or (c) MBAR estimator, using weighting scheme (c). A comparison of the average UCSF DOCK 6 grid score with experiment is shown in (d). Note that the y axes have different limits. In contrast to Fig. 10 of the main text, this figure includes the outlier iodobenzene.

Table S7: **Comparing different free energy estimates with experiment.** AlGDock calculations were based on 384 snapshots from simulations with active ligands, weighted according to scheme (c). As DOCK 6 does not have an implicit solvent, OBC2 and PBSA describe the receptor potential energies used for snapshot weights. In contrast with Table 3 of the main text, this analysis includes the outlier, iodobenzene.

| Method      | Implicit solvent | Spearman $\rho$ | Kendall $\tau$ | Pearson R  | RMSE        |
|-------------|------------------|-----------------|----------------|------------|-------------|
| DOCK 6      | OBC2             | 0.33(0.00)      | 0.22(0.01)     | 0.43(0.04) | 11.98(0.36) |
| DOCK 6      | PBSA             | 0.41(0.01)      | 0.30(0.01)     | 0.48(0.04) | 12.56(0.37) |
| min $\Psi$  | OBC2             | 0.41(0.00)      | 0.30(0.01)     | 0.54(0.03) | 15.42(0.59) |
| min $\Psi$  | PBSA             | 0.43(0.00)      | 0.33(0.01)     | 0.54(0.03) | 13.95(0.60) |
| mean $\Psi$ | OBC2             | 0.41(0.01)      | 0.32(0.01)     | 0.51(0.04) | 9.62(0.47)  |
| mean $\Psi$ | PBSA             | 0.47(0.01)      | 0.36(0.01)     | 0.50(0.04) | 7.36(0.41)  |
| MBAR-based  | OBC2             | 0.39(0.01)      | 0.27(0.02)     | 0.46(0.05) | 1.54(0.18)  |
| MBAR-based  | PBSA             | 0.48(0.00)      | 0.38(0.01)     | 0.47(0.06) | 3.18(0.44)  |

## References

- (1) Weininger, D. *J. Chem. Inf. Comput. Sci.* **1988**, *28*, 31–36.
- (2) Morton, A.; Baase, W. A.; Matthews, B. W. *Biochemistry* **1995**, *34*, 8564–8575.
- (3) Mobley, D. L.; Graves, A. P.; Chodera, J. D.; McReynolds, A. C.; Shoichet, B. K.; Dill, K. A. *J. Mol. Biol.* **2007**, *371*, 1118–1134.
- (4) Liu, L.; Baase, W. A.; Matthews, B. W. *J. Mol. Biol.* **2009**, *385*, 595–605.
- (5) Gallicchio, E.; Lapelosa, M.; Levy, R. M. *J. Chem. Theory Comput.* **2010**, *6*, 2961–2977.
- (6) Purisima, E. O.; Hogue, H. *J. Phys. Chem. B* **2012**, *116*, 6872–9.
- (7) Ucisik, M. N.; Zheng, Z.; Faver, J. C.; Merz, K. M. *J. Chem. Theory Comput.* **2014**, *10*, 1314–1325.
